# Supplementary material for: A novel age-related gene expression signature associates with proliferation and disease progression in breast cancer
Source: PubMed Central journal article supplement (PMC9643541; doi:10.1038/s41416-022-01953-w), 2022-08-23
Supplement: 41416_2022_1953_MOESM1_ESM.pdf [file 41416_2022_1953_MOESM1_ESM.pdf]

**Supplementary Table 1: Differentially expressed genes from the Discovery and Validation datasets with fold change  $\geq 1.5$  /  $\leq -1.5$ .**

Blue column: Differentially expressed genes queried in CLUE, L1000 assay.

Red and green colored cells: Differentially expressed genes, up- and downregulated, queried in CLUE, L1000 assay.

| DISCOVERY cohort |               |      |             |                  |        |     |             |
|------------------|---------------|------|-------------|------------------|--------|-----|-------------|
| Down-regulated   |               |      |             | Up-regulated     |        |     |             |
| Probe_ID         | Gene          | FDR  | Fold Change | Probe_ID         | Gene   | FDR | Fold Change |
| ILMN_16<br>78535 | ESR1          | 0    | -4.237      | ILMN_16<br>89146 | GABRP  | 0   | 3.101       |
| ILMN_17<br>56727 | ANKRD30<br>A  | 0    | -3.917      | ILMN_17<br>25276 | C4ORF7 | 0   | 2.878       |
| ILMN_17<br>66650 | FOXA1         | 0    | -3.124      | ILMN_16<br>69820 | KRT6B  | 0   | 2.7         |
| ILMN_20<br>50246 | AGR3          | 0    | -3.065      | ILMN_18<br>13270 | ELF5   | 0   | 2.632       |
| ILMN_17<br>20998 | CA12          | 0    | -2.972      | ILMN_17<br>92400 | CSN3   | 0   | 2.628       |
| ILMN_16<br>51329 | LOC64636<br>0 | 0    | -2.935      | ILMN_16<br>85403 | MMP7   | 0   | 2.47        |
| ILMN_17<br>23333 | SCGB2A2       | 0.05 | -2.801      | ILMN_16<br>68766 | ROPN1  | 0   | 2.441       |
| ILMN_20<br>66088 | C1ORF64       | 0    | -2.706      | ILMN_17<br>86720 | PROM1  | 0   | 2.357       |
| ILMN_20<br>92077 | PIP           | 0    | -2.698      | ILMN_17<br>38401 | FOXC1  | 0   | 2.291       |
| ILMN_17<br>95342 | MLPH          | 0    | -2.595      | ILMN_21<br>49164 | SFRP1  | 0   | 2.239       |
| ILMN_17<br>28550 | CYP4Z1        | 0    | -2.508      | ILMN_18<br>01442 | KRT81  | 0   | 2.223       |

|                  |               |       |        |                  |         |       |       |
|------------------|---------------|-------|--------|------------------|---------|-------|-------|
| ILMN_18<br>11387 | TFF3          | 0     | -2.455 | ILMN_16<br>86573 | DEFB1   | 0     | 2.191 |
| ILMN_17<br>74287 | CFB           | 0     | -2.365 | ILMN_16<br>66845 | KRT17   | 0     | 2.165 |
| ILMN_17<br>97170 | CYP4Z2P       | 0     | -2.365 | ILMN_17<br>50974 | S100A9  | 0.047 | 2.111 |
| ILMN_17<br>14536 | SCGB1D2       | 0.133 | -2.328 | ILMN_23<br>44120 | ROPN1B  | 0     | 2.093 |
| ILMN_18<br>26165 | HS.15926<br>4 | 0     | -2.302 | ILMN_17<br>29216 | CRYAB   | 0     | 2.073 |
| ILMN_17<br>43055 | NAT1          | 0     | -2.292 | ILMN_17<br>20373 | SLC7A5  | 0     | 2.027 |
| ILMN_17<br>79416 | SCUBE2        | 0     | -2.234 | ILMN_17<br>95325 | ACTG2   | 0     | 2.027 |
| ILMN_16<br>69338 | CYP4X1        | 0     | -2.213 | ILMN_17<br>19753 | VGLL1   | 0     | 1.963 |
| ILMN_18<br>98518 | HS.38834<br>7 | 0     | -2.177 | ILMN_16<br>92938 | PSAT1   | 0     | 1.96  |
| ILMN_24<br>06656 | GATA3         | 0     | -2.152 | ILMN_16<br>53750 | SOX10   | 0     | 1.959 |
| ILMN_22<br>98727 | MAPT          | 0     | -2.151 | ILMN_23<br>01083 | UBE2C   | 0     | 1.929 |
| ILMN_16<br>97460 | REEP6         | 0     | -2.126 | ILMN_17<br>43620 | RARRES1 | 0     | 1.9   |
| ILMN_17<br>13995 | SCNN1A        | 0     | -2.121 | ILMN_23<br>53054 | KLK5    | 0     | 1.899 |
| ILMN_16<br>76990 | LOC33857<br>9 | 0     | -2.109 | ILMN_21<br>05441 | IGJ     | 0     | 1.894 |
| ILMN_21<br>61330 | SPDEF         | 0     | -2.084 | ILMN_23<br>83807 | CALB2   | 0     | 1.887 |
| ILMN_22<br>69256 | DNAJC12       | 0     | -2.069 | ILMN_16<br>92223 | LCN2    | 0     | 1.883 |

|                  |               |       |        |                  |              |       |       |
|------------------|---------------|-------|--------|------------------|--------------|-------|-------|
| ILMN_17<br>11894 | MYB           | 0     | -2.039 | ILMN_17<br>04294 | CDH3         | 0     | 1.875 |
| ILMN_17<br>63704 | RGS11         | 0     | -2.027 | ILMN_16<br>83450 | CDCA5        | 0     | 1.872 |
| ILMN_17<br>22489 | TFF1          | 0.416 | -2.015 | ILMN_22<br>12909 | MELK         | 0     | 1.87  |
| ILMN_17<br>97154 | AZGP1         | 0     | -1.985 | ILMN_22<br>55133 | BCL11A       | 0     | 1.867 |
| ILMN_17<br>12522 | CEACAM6       | 0.13  | -1.969 | ILMN_17<br>28132 | LDHB         | 0     | 1.864 |
| ILMN_16<br>77108 | CAPN13        | 0     | -1.965 | ILMN_16<br>63390 | CDC20        | 0     | 1.849 |
| ILMN_17<br>69771 | LOC38981<br>6 | 0     | -1.951 | ILMN_17<br>08934 | ADM          | 0     | 1.846 |
| ILMN_17<br>77644 | PIB5PA        | 0     | -1.95  | ILMN_17<br>09645 | CBX2         | 0     | 1.841 |
| ILMN_16<br>95093 | SLC7A8        | 0     | -1.945 | ILMN_17<br>37184 | CDCA7        | 0     | 1.831 |
| ILMN_17<br>68772 | DEGS2         | 0     | -1.944 | ILMN_17<br>26204 | SCRG1        | 0     | 1.827 |
| ILMN_16<br>95397 | LOC64415<br>1 | 0     | -1.942 | ILMN_17<br>29801 | S100A8       | 0.253 | 1.824 |
| ILMN_17<br>85570 | SUSD3         | 0     | -1.934 | ILMN_16<br>93218 | ART3         | 0     | 1.823 |
| ILMN_16<br>80110 | C10ORF1<br>16 | 0     | -1.931 | ILMN_17<br>25791 | PTPLA        | 0     | 1.814 |
| ILMN_17<br>33746 | REEP1         | 0     | -1.928 | ILMN_17<br>31640 | MGC3990<br>0 | 0     | 1.811 |
| ILMN_16<br>57760 | SYT17         | 0     | -1.923 | ILMN_17<br>04398 | FZD9         | 0     | 1.801 |
| ILMN_18<br>15203 | HMGCS2        | 0.077 | -1.922 | ILMN_18<br>01939 | CCNB2        | 0     | 1.8   |

|                  |               |       |        |                  |               |       |       |  |
|------------------|---------------|-------|--------|------------------|---------------|-------|-------|--|
| ILMN_17<br>11451 | SLC7A2        | 0.05  | -1.918 | ILMN_16<br>81737 | TMSB15A       | 0     | 1.8   |  |
| ILMN_17<br>03891 | TBC1D9        | 0     | -1.913 | ILMN_21<br>14720 | SLPI          | 0     | 1.79  |  |
| ILMN_17<br>28799 | FBP1          | 0     | -1.905 | ILMN_16<br>61733 | FOLR1         | 0     | 1.764 |  |
| ILMN_16<br>99665 | CLIC6         | 0.182 | -1.901 | ILMN_17<br>58497 | TTYH1         | 0     | 1.762 |  |
| ILMN_18<br>14151 | AGR2          | 0     | -1.887 | ILMN_21<br>70813 | LAMP3         | 0     | 1.744 |  |
| ILMN_17<br>53139 | LOC12422<br>0 | 0     | -1.886 | ILMN_16<br>54072 | CX3CL1        | 0     | 1.74  |  |
| ILMN_16<br>80757 | LRRC26        | 0     | -1.883 | ILMN_17<br>82389 | LAD1          | 0     | 1.739 |  |
| ILMN_22<br>20735 | CLEC3A        | 0.399 | -1.877 | ILMN_16<br>63119 | DSC2          | 0     | 1.726 |  |
| ILMN_21<br>91192 | CYP2B7P1      | 0     | -1.862 | ILMN_17<br>13952 | C1ORF10<br>6  | 0     | 1.708 |  |
| ILMN_16<br>70099 | NOSTRIN       | 0     | -1.855 | ILMN_17<br>74265 | C2ORF82       | 0     | 1.702 |  |
| ILMN_17<br>36670 | PPP1R3C       | 0     | -1.851 | ILMN_16<br>74228 | LOC65175<br>1 | 0.276 | 1.701 |  |
| ILMN_16<br>77314 | MUC1          | 0     | -1.835 | ILMN_16<br>56713 | IGLL1         | 0.36  | 1.682 |  |
| ILMN_17<br>81745 | C9ORF15<br>2  | 0     | -1.821 | ILMN_17<br>36760 | KRT16         | 0     | 1.679 |  |
| ILMN_17<br>45501 | DNALI1        | 0     | -1.819 | ILMN_17<br>80255 | KLK6          | 0     | 1.678 |  |
| ILMN_18<br>53592 | TFAP2B        | 0     | -1.815 | ILMN_16<br>80274 | LOC65269<br>4 | 1.205 | 1.674 |  |
| ILMN_17<br>67351 | AR            | 0     | -1.812 | ILMN_17<br>34929 | BBOX1         | 0     | 1.669 |  |

|                  |               |       |        |                  |          |       |       |  |
|------------------|---------------|-------|--------|------------------|----------|-------|-------|--|
| ILMN_21<br>08735 | EEF1A2        | 0.133 | -1.807 | ILMN_17<br>96589 | TRIP13   | 0     | 1.668 |  |
| ILMN_17<br>72686 | FGD3          | 0     | -1.8   | ILMN_23<br>49459 | BIRC5    | 0     | 1.666 |  |
| ILMN_16<br>85703 | ACOX2         | 0     | -1.8   | ILMN_17<br>04537 | PHGDH    | 0     | 1.656 |  |
| ILMN_17<br>57019 | NTN4          | 0     | -1.78  | ILMN_17<br>15463 | SOSTDC1  | 0     | 1.654 |  |
| ILMN_16<br>69114 | WNK4          | 0     | -1.778 | ILMN_20<br>94061 | IMPA2    | 0     | 1.647 |  |
| ILMN_16<br>77636 | COMP          | 0     | -1.777 | ILMN_21<br>25346 | MUC16    | 0     | 1.641 |  |
| ILMN_23<br>86053 | DACH1         | 0     | -1.768 | ILMN_16<br>64855 | PPP1R14C | 0     | 1.639 |  |
| ILMN_22<br>40221 | SYTL2         | 0     | -1.746 | ILMN_17<br>93888 | SERPINB5 | 0     | 1.635 |  |
| ILMN_20<br>53103 | SLC40A1       | 0     | -1.74  | ILMN_17<br>70725 | AIF1L    | 0     | 1.628 |  |
| ILMN_23<br>16955 | SERPINA1<br>1 | 0     | -1.738 | ILMN_17<br>72964 | CCL8     | 0     | 1.628 |  |
| ILMN_17<br>08513 | BNIPL         | 0     | -1.737 | ILMN_17<br>48352 | CTSL2    | 0     | 1.627 |  |
| ILMN_21<br>43566 | SLC39A6       | 0.05  | -1.73  | ILMN_23<br>84785 | CCNE1    | 0     | 1.626 |  |
| ILMN_16<br>74908 | HOXB5         | 0     | -1.726 | ILMN_16<br>58040 | CRABP1   | 0.135 | 1.625 |  |
| ILMN_22<br>16637 | STK32B        | 0     | -1.724 | ILMN_17<br>17636 | RGMA     | 0     | 1.624 |  |
| ILMN_23<br>65465 | XBP1          | 0     | -1.72  | ILMN_18<br>01257 | CENPA    | 0     | 1.621 |  |
| ILMN_22<br>12999 | KIF5C         | 0     | -1.72  | ILMN_16<br>70238 | CDC45L   | 0     | 1.621 |  |

|                  |               |       |        |                  |               |       |       |  |
|------------------|---------------|-------|--------|------------------|---------------|-------|-------|--|
| ILMN_17<br>56469 | GAMT          | 0     | -1.715 | ILMN_18<br>06040 | TYMS          | 0     | 1.619 |  |
| ILMN_18<br>88359 | HS.57306<br>2 | 0.276 | -1.715 | ILMN_16<br>99214 | LOC64745<br>0 | 2.036 | 1.617 |  |
| ILMN_17<br>30622 | EVL           | 0     | -1.71  | ILMN_21<br>46766 | FABP5         | 0     | 1.615 |  |
| ILMN_22<br>90068 | VAV3          | 0     | -1.7   | ILMN_16<br>52199 | LOC64211<br>3 | 2.346 | 1.615 |  |
| ILMN_17<br>94803 | NDP           | 0.078 | -1.7   | ILMN_20<br>72296 | CKS2          | 0     | 1.612 |  |
| ILMN_16<br>82288 | LOC72856<br>5 | 0     | -1.698 | ILMN_16<br>80618 | MYC           | 0     | 1.609 |  |
| ILMN_18<br>44029 | HS.7413       | 0     | -1.688 | ILMN_17<br>50518 | THOC4         | 0     | 1.607 |  |
| ILMN_22<br>53805 | GFRA1         | 0     | -1.686 | ILMN_17<br>12075 | SYNM          | 0     | 1.607 |  |
| ILMN_16<br>55195 | SMA4          | 0     | -1.679 | ILMN_17<br>16909 | ADAMDE<br>C1  | 0     | 1.604 |  |
| ILMN_23<br>11873 | GP2           | 0.046 | -1.676 | ILMN_17<br>39508 | LOC65249<br>3 | 2.436 | 1.603 |  |
| ILMN_17<br>09634 | CMBL          | 0     | -1.669 | ILMN_16<br>65035 | KRT14         | 0.048 | 1.601 |  |
| ILMN_17<br>30039 | IGSF21        | 0     | -1.664 | ILMN_17<br>53196 | PTTG1         | 0     | 1.599 |  |
| ILMN_17<br>02835 | SH3BGRL       | 0     | -1.663 | ILMN_24<br>13899 | MCM10         | 0     | 1.598 |  |
| ILMN_17<br>28098 | LOC65308<br>0 | 0     | -1.658 | ILMN_18<br>48552 | HS.37035<br>9 | 0     | 1.598 |  |
| ILMN_18<br>05228 | LRG1          | 0     | -1.656 | ILMN_16<br>52975 | DLK1          | 0     | 1.596 |  |
| ILMN_16<br>86562 | KIF13B        | 0     | -1.652 | ILMN_17<br>63907 | C6ORF17<br>3  | 0     | 1.595 |  |

|                  |               |       |        |                  |               |       |       |  |
|------------------|---------------|-------|--------|------------------|---------------|-------|-------|--|
| ILMN_16<br>96243 | FLJ23152      | 0     | -1.65  | ILMN_16<br>82015 | GAL           | 0     | 1.595 |  |
| ILMN_16<br>72124 | C4ORF18       | 0     | -1.648 | ILMN_17<br>37972 | TSPYL5        | 0     | 1.595 |  |
| ILMN_18<br>37428 | HS.25318      | 0     | -1.637 | ILMN_17<br>49875 | LOC72871<br>5 | 0     | 1.585 |  |
| ILMN_16<br>85174 | CPB1          | 2.51  | -1.637 | ILMN_21<br>61820 | GLYATL2       | 0.206 | 1.582 |  |
| ILMN_16<br>68619 | KIAA1467      | 0     | -1.634 | ILMN_17<br>20526 | CENPN         | 0     | 1.58  |  |
| ILMN_17<br>16176 | RARA          | 0     | -1.626 | ILMN_17<br>21868 | KPNA2         | 0     | 1.577 |  |
| ILMN_17<br>23709 | C9ORF11<br>6  | 0     | -1.626 | ILMN_17<br>78991 | NFIB          | 0     | 1.571 |  |
| ILMN_18<br>49013 | HS.57098<br>8 | 0     | -1.624 | ILMN_17<br>77564 | MAD2L1        | 0     | 1.57  |  |
| ILMN_17<br>18934 | LOC72849<br>9 | 0     | -1.607 | ILMN_17<br>18295 | STAC2         | 0     | 1.57  |  |
| ILMN_17<br>95582 | CHRD          | 0     | -1.606 | ILMN_16<br>87978 | PHLDA1        | 0     | 1.565 |  |
| ILMN_18<br>35913 | HS.14447<br>9 | 0.186 | -1.606 | ILMN_16<br>80955 | AURKA         | 0     | 1.563 |  |
| ILMN_16<br>62587 | PNPLA7        | 0     | -1.605 | ILMN_17<br>14335 | RDH10         | 0     | 1.563 |  |
| ILMN_16<br>91884 | STC2          | 0.703 | -1.601 | ILMN_17<br>91759 | CXCL10        | 0.163 | 1.559 |  |
| ILMN_17<br>38989 | GOLSYN        | 0     | -1.6   | ILMN_17<br>51120 | HIST1H4H      | 0.047 | 1.558 |  |
| ILMN_17<br>90317 | RAB26         | 0     | -1.599 | ILMN_17<br>49868 | FAM171A<br>1  | 0     | 1.557 |  |
| ILMN_17<br>79517 | RASEF         | 0     | -1.599 | ILMN_17<br>57255 | CDKN2A        | 0     | 1.556 |  |

|                  |               |       |        |                  |               |       |       |  |
|------------------|---------------|-------|--------|------------------|---------------|-------|-------|--|
| ILMN_16<br>56920 | CRIP1         | 0     | -1.597 | ILMN_23<br>02654 | LRP8          | 0     | 1.554 |  |
| ILMN_17<br>83690 | LOC38874<br>3 | 0     | -1.594 | ILMN_17<br>37728 | CDCA3         | 0     | 1.554 |  |
| ILMN_17<br>46359 | RERG          | 0     | -1.593 | ILMN_17<br>47911 | CDC2          | 0     | 1.545 |  |
| ILMN_17<br>12305 | CYBRD1        | 0     | -1.591 | ILMN_20<br>49021 | PTTG3P        | 0     | 1.542 |  |
| ILMN_18<br>10274 | HOXB2         | 0     | -1.586 | ILMN_18<br>13314 | HIST1H2B<br>K | 0     | 1.536 |  |
| ILMN_17<br>70444 | SMA5          | 0     | -1.585 | ILMN_21<br>97365 | RGS2          | 0     | 1.536 |  |
| ILMN_17<br>48323 | CXCL14        | 0.229 | -1.585 | ILMN_17<br>56071 | MFGE8         | 0     | 1.534 |  |
| ILMN_16<br>56915 | PSD3          | 0     | -1.58  | ILMN_17<br>16195 | HIST1H2B<br>G | 0     | 1.534 |  |
| ILMN_24<br>13323 | GRP           | 0.077 | -1.577 | ILMN_18<br>10978 | MUCL1         | 11.18 | 1.534 |  |
| ILMN_17<br>14167 | CYB5A         | 0     | -1.576 | ILMN_17<br>81943 | FAM83D        | 0     | 1.533 |  |
| ILMN_16<br>85943 | LOC37529<br>5 | 0     | -1.575 | ILMN_22<br>94086 | STMN1         | 0     | 1.532 |  |
| ILMN_17<br>05991 | GUSBL1        | 0     | -1.571 | ILMN_22<br>02948 | BUB1          | 0     | 1.531 |  |
| ILMN_16<br>95002 | PKIB          | 0     | -1.571 | ILMN_17<br>03487 | LMO4          | 0     | 1.53  |  |
| ILMN_16<br>97561 | FBXL16        | 0     | -1.563 | ILMN_21<br>09489 | GZMB          | 0     | 1.528 |  |
| ILMN_16<br>85433 | COL8A1        | 0     | -1.563 | ILMN_17<br>96316 | MMP9          | 0.206 | 1.526 |  |
| ILMN_17<br>01613 | RARRES3       | 0     | -1.561 | ILMN_17<br>46673 | 03-Sep        | 0     | 1.525 |  |



|                  |               |       |        |                  |               |       |       |  |
|------------------|---------------|-------|--------|------------------|---------------|-------|-------|--|
| ILMN_16<br>93090 | CROT          | 0     | -1.56  | ILMN_17<br>13813 | LOC40057<br>8 | 0     | 1.524 |  |
| ILMN_17<br>89502 | GPC4          | 0     | -1.558 | ILMN_17<br>56849 | HIST1H2A<br>E | 0     | 1.52  |  |
| ILMN_17<br>65636 | FLJ22184      | 0     | -1.553 | ILMN_18<br>01632 | KRT5          | 0     | 1.52  |  |
| ILMN_17<br>42534 | COL4A5        | 0     | -1.552 | ILMN_17<br>09294 | CDCA8         | 0     | 1.518 |  |
| ILMN_20<br>69224 | PVALB         | 0.524 | -1.552 | ILMN_16<br>59110 | MGC4048<br>9  | 0     | 1.517 |  |
| ILMN_23<br>58760 | HPN           | 0     | -1.551 | ILMN_16<br>95891 | LOC65277<br>5 | 0.186 | 1.517 |  |
| ILMN_17<br>51034 | ITPRIPL2      | 0     | -1.546 | ILMN_16<br>85916 | KIF2C         | 0     | 1.516 |  |
| ILMN_17<br>19622 | RABEP1        | 0     | -1.545 | ILMN_23<br>23508 | C9ORF58       | 0     | 1.516 |  |
| ILMN_16<br>72000 | LOC64246<br>0 | 0     | -1.545 | ILMN_17<br>29749 | HERC5         | 0     | 1.515 |  |
| ILMN_16<br>79632 | LOC38903<br>3 | 0.047 | -1.541 | ILMN_21<br>95914 | GGH           | 0     | 1.515 |  |
| ILMN_17<br>76121 | MGC4236<br>7  | 0     | -1.54  | ILMN_16<br>93192 | PI3           | 0     | 1.514 |  |
| ILMN_18<br>11632 | FMO5          | 0     | -1.535 | ILMN_17<br>07339 | BTG3          | 0     | 1.513 |  |
| ILMN_22<br>81786 | RTN1          | 0.043 | -1.535 | ILMN_16<br>84158 | GPT2          | 0     | 1.513 |  |
| ILMN_16<br>52826 | LRRC17        | 0     | -1.532 | ILMN_16<br>53006 | CSN1S1        | 0     | 1.511 |  |
| ILMN_17<br>01918 | KLHDC9        | 0     | -1.525 | ILMN_18<br>05737 | PFKP          | 0     | 1.509 |  |
| ILMN_17<br>75235 | AFF3          | 0.207 | -1.524 | ILMN_21<br>89675 | HRCT1         | 0     | 1.508 |  |

|                  |               |       |        |                  |               |   |       |  |
|------------------|---------------|-------|--------|------------------|---------------|---|-------|--|
| ILMN_17<br>94863 | CAMK2N1       | 0     | -1.521 | ILMN_17<br>41054 | SLC5A6        | 0 | 1.504 |  |
| ILMN_16<br>90304 | MGC2671<br>8  | 0     | -1.52  | ILMN_17<br>29115 | LOC65181<br>6 | 0 | 1.502 |  |
| ILMN_16<br>59610 | TJP3          | 0     | -1.519 |                  |               |   |       |  |
| ILMN_17<br>37992 | CRAT          | 0     | -1.519 |                  |               |   |       |  |
| ILMN_17<br>84985 | PRRT3         | 0     | -1.516 |                  |               |   |       |  |
| ILMN_17<br>70085 | BTG2          | 0     | -1.516 |                  |               |   |       |  |
| ILMN_16<br>60727 | ENPP5         | 0     | -1.516 |                  |               |   |       |  |
| ILMN_21<br>48469 | RASL11B       | 0     | -1.515 |                  |               |   |       |  |
| ILMN_17<br>67377 | LOC15356<br>1 | 0     | -1.514 |                  |               |   |       |  |
| ILMN_16<br>72122 | P4HTM         | 0     | -1.51  |                  |               |   |       |  |
| ILMN_16<br>63035 | SREBF1        | 0     | -1.51  |                  |               |   |       |  |
| ILMN_17<br>44023 | MGC1821<br>6  | 0     | -1.509 |                  |               |   |       |  |
| ILMN_17<br>31073 | CAPN9         | 0     | -1.508 |                  |               |   |       |  |
| ILMN_17<br>59563 | NRIP3         | 0.232 | -1.505 |                  |               |   |       |  |
| ILMN_17<br>31446 | COL11A1       | 0.432 | -1.505 |                  |               |   |       |  |
| ILMN_17<br>72588 | C6ORF97       | 0     | -1.502 |                  |               |   |       |  |

|                  |               |       |        |  |  |  |  |  |
|------------------|---------------|-------|--------|--|--|--|--|--|
| ILMN_16<br>97317 | DYNLRB2       | 0     | -1.502 |  |  |  |  |  |
| ILMN_17<br>39233 | LOC64887<br>9 | 0.045 | -1.5   |  |  |  |  |  |



**VALIDATION cohort**

Down-regulated

Up-regulated

| Probe_ID         | ILMN_Gen | FDR   | Fold Change | Probe_ID         | ILMN_Gen     | FDR | Fold Change |
|------------------|----------|-------|-------------|------------------|--------------|-----|-------------|
| ILMN_16<br>78535 | ESR1     | 0     | -4.801      | ILMN_16<br>89146 | GABRP        | 0   | 3.18        |
| ILMN_20<br>66088 | C1ORF64  | 0     | -3.028      | ILMN_16<br>69820 | KRT6B        | 0   | 2.904       |
| ILMN_17<br>66650 | FOXA1    | 0     | -2.929      | ILMN_17<br>25276 | C4ORF7       | 0   | 2.809       |
| ILMN_17<br>95342 | MLPH     | 0     | -2.868      | ILMN_17<br>86720 | PROM1        | 0   | 2.56        |
| ILMN_17<br>79416 | SCUBE2   | 0     | -2.855      | ILMN_17<br>50974 | S100A9       | 0   | 2.516       |
| ILMN_20<br>50246 | AGR3     | 0     | -2.746      | ILMN_17<br>29801 | S100A8       | 0   | 2.48        |
| ILMN_17<br>20998 | CA12     | 0     | -2.688      | ILMN_21<br>49164 | SFRP1        | 0   | 2.475       |
| ILMN_24<br>06656 | GATA3    | 0     | -2.678      | ILMN_18<br>13270 | ELF5         | 0   | 2.42        |
| ILMN_18<br>11387 | TFF3     | 0     | -2.671      | ILMN_18<br>01442 | KRT81        | 0   | 2.35        |
| ILMN_17<br>43055 | NAT1     | 0     | -2.518      | ILMN_17<br>13952 | C1ORF10<br>6 | 0   | 2.325       |
| ILMN_17<br>22489 | TFF1     | 0.078 | -2.437      | ILMN_16<br>92938 | PSAT1        | 0   | 2.304       |

|                  |               |       |        |                  |             |   |       |
|------------------|---------------|-------|--------|------------------|-------------|---|-------|
| ILMN_17<br>56727 | ANKRD30<br>A  | 0.072 | -2.392 | ILMN_17<br>82389 | LAD1        | 0 | 2.278 |
| ILMN_18<br>26165 | HS.15926<br>4 | 0     | -2.363 | ILMN_16<br>85403 | MMP7        | 0 | 2.274 |
| ILMN_20<br>92077 | PIP           | 0.163 | -2.362 | ILMN_17<br>04294 | CDH3        | 0 | 2.219 |
| ILMN_22<br>98727 | MAPT          | 0     | -2.358 | ILMN_17<br>38401 | FOXC1       | 0 | 2.216 |
| ILMN_21<br>08735 | EEF1A2        | 0     | -2.308 | ILMN_23<br>53161 | MSLN        | 0 | 2.175 |
| ILMN_16<br>85174 | CPB1          | 0     | -2.229 | ILMN_16<br>68766 | ROPN1       | 0 | 2.149 |
| ILMN_18<br>88359 | HS.57306<br>2 | 0     | -2.179 | ILMN_17<br>20373 | SLC7A5      | 0 | 2.125 |
| ILMN_18<br>98518 | HS.38834<br>7 | 0     | -2.158 | ILMN_22<br>55133 | BCL11A      | 0 | 2.125 |
| ILMN_16<br>91884 | STC2          | 0     | -2.158 | ILMN_16<br>92223 | LCN2        | 0 | 2.118 |
| ILMN_17<br>14536 | SCGB1D2       | 0.421 | -2.151 | ILMN_17<br>43620 | RARRES1     | 0 | 2.118 |
| ILMN_17<br>45501 | DNALI1        | 0     | -2.097 | ILMN_16<br>53750 | SOX10       | 0 | 2.068 |
| ILMN_17<br>85570 | SUSD3         | 0     | -2.091 | ILMN_17<br>49118 | CALML5      | 0 | 2.045 |
| ILMN_22<br>69256 | DNAJC12       | 0     | -2.089 | ILMN_17<br>92455 | TMEM15<br>8 | 0 | 2.044 |
| ILMN_17<br>03891 | TBC1D9        | 0     | -2.086 | ILMN_17<br>28132 | LDHB        | 0 | 2.036 |
| ILMN_16<br>51329 | LOC64636<br>0 | 0     | -2.078 | ILMN_16<br>86573 | DEFB1       | 0 | 2.016 |
| ILMN_16<br>69338 | CYP4X1        | 0     | -2.009 | ILMN_16<br>63119 | DSC2        | 0 | 1.944 |

|                  |               |       |        |                  |               |       |       |
|------------------|---------------|-------|--------|------------------|---------------|-------|-------|
| ILMN_17<br>97154 | AZGP1         | 0     | -1.927 | ILMN_16<br>58040 | CRABP1        | 0     | 1.933 |
| ILMN_21<br>61330 | SPDEF         | 0     | -1.926 | ILMN_16<br>66845 | KRT17         | 0     | 1.924 |
| ILMN_21<br>43566 | SLC39A6       | 0     | -1.924 | ILMN_16<br>80274 | LOC65269<br>4 | 0.197 | 1.924 |
| ILMN_16<br>97460 | REEP6         | 0     | -1.92  | ILMN_18<br>01632 | KRT5          | 0     | 1.92  |
| ILMN_18<br>44029 | HS.7413       | 0     | -1.914 | ILMN_17<br>09645 | CBX2          | 0     | 1.911 |
| ILMN_18<br>35913 | HS.14447<br>9 | 0     | -1.91  | ILMN_16<br>52199 | LOC64211<br>3 | 0.391 | 1.909 |
| ILMN_17<br>11894 | MYB           | 0     | -1.896 | ILMN_22<br>19002 | KRT6A         | 0     | 1.908 |
| ILMN_17<br>09634 | CMBL          | 0     | -1.892 | ILMN_17<br>93888 | SERPINB5      | 0     | 1.9   |
| ILMN_16<br>95397 | LOC64415<br>1 | 0     | -1.879 | ILMN_17<br>58497 | TTYH1         | 0     | 1.892 |
| ILMN_17<br>77644 | PIB5PA        | 0     | -1.877 | ILMN_16<br>99214 | LOC64745<br>0 | 0.39  | 1.888 |
| ILMN_17<br>75235 | AFF3          | 0     | -1.874 | ILMN_17<br>13397 | NCCRP1        | 0     | 1.884 |
| ILMN_16<br>60372 | GRIA2         | 0.076 | -1.873 | ILMN_23<br>44120 | ROPN1B        | 0     | 1.875 |
| ILMN_16<br>85703 | ACOX2         | 0     | -1.872 | ILMN_17<br>04537 | PHGDH         | 0     | 1.862 |
| ILMN_23<br>86053 | DACH1         | 0     | -1.869 | ILMN_16<br>56713 | IGLL1         | 0.122 | 1.859 |
| ILMN_16<br>76990 | LOC33857<br>9 | 0     | -1.858 | ILMN_21<br>14720 | SLPI          | 0     | 1.854 |
| ILMN_16<br>77636 | COMP          | 0     | -1.831 | ILMN_17<br>39508 | LOC65249<br>3 | 0.638 | 1.846 |

|                  |               |       |        |                  |              |   |       |
|------------------|---------------|-------|--------|------------------|--------------|---|-------|
| ILMN_22<br>53805 | GFRA1         | 0     | -1.808 | ILMN_17<br>37184 | CDCA7        | 0 | 1.844 |
| ILMN_17<br>74287 | CFB           | 0     | -1.807 | ILMN_21<br>61820 | GLYATL2      | 0 | 1.837 |
| ILMN_22<br>12999 | KIF5C         | 0     | -1.804 | ILMN_21<br>79083 | LOXL4        | 0 | 1.806 |
| ILMN_17<br>28550 | CYP4Z1        | 0.11  | -1.797 | ILMN_17<br>73459 | SOX11        | 0 | 1.806 |
| ILMN_16<br>70099 | NOSTRIN       | 0     | -1.791 | ILMN_16<br>93192 | PI3          | 0 | 1.805 |
| ILMN_16<br>80110 | C10ORF1<br>16 | 0     | -1.787 | ILMN_17<br>26204 | SCRG1        | 0 | 1.794 |
| ILMN_17<br>23333 | SCGB2A2       | 3.926 | -1.786 | ILMN_21<br>46766 | FABP5        | 0 | 1.788 |
| ILMN_18<br>11330 | FAM134B       | 0     | -1.781 | ILMN_17<br>49868 | FAM171A<br>1 | 0 | 1.787 |
| ILMN_17<br>28799 | FBP1          | 0     | -1.778 | ILMN_16<br>54072 | CX3CL1       | 0 | 1.787 |
| ILMN_18<br>15203 | HMGCS2        | 0.393 | -1.777 | ILMN_21<br>70813 | LAMP3        | 0 | 1.783 |
| ILMN_16<br>69114 | WNK4          | 0     | -1.767 | ILMN_17<br>45299 | FABP7        | 0 | 1.78  |
| ILMN_16<br>68619 | KIAA1467      | 0     | -1.752 | ILMN_17<br>95325 | ACTG2        | 0 | 1.78  |
| ILMN_22<br>40221 | SYTL2         | 0     | -1.749 | ILMN_17<br>19753 | VGLL1        | 0 | 1.775 |
| ILMN_23<br>11873 | GP2           | 0     | -1.746 | ILMN_17<br>12075 | SYNM         | 0 | 1.771 |
| ILMN_17<br>68772 | DEGS2         | 0     | -1.743 | ILMN_16<br>64855 | PPP1R14C     | 0 | 1.767 |
| ILMN_17<br>97170 | CYP4Z2P       | 0.12  | -1.742 | ILMN_17<br>80255 | KLK6         | 0 | 1.766 |



|                  |               |       |        |                  |               |       |       |
|------------------|---------------|-------|--------|------------------|---------------|-------|-------|
| ILMN_16<br>96243 | FLJ23152      | 0     | -1.73  | ILMN_17<br>16424 | PKP1          | 0     | 1.764 |
| ILMN_16<br>95002 | PKIB          | 0     | -1.723 | ILMN_17<br>41054 | SLC5A6        | 0     | 1.756 |
| ILMN_16<br>88228 | LOC14583<br>7 | 0     | -1.719 | ILMN_17<br>53954 | OLFM4         | 0     | 1.746 |
| ILMN_18<br>14151 | AGR2          | 0     | -1.713 | ILMN_17<br>03487 | LMO4          | 0     | 1.726 |
| ILMN_17<br>30039 | IGSF21        | 0     | -1.706 | ILMN_16<br>74228 | LOC65175<br>1 | 0.336 | 1.725 |
| ILMN_17<br>53139 | LOC12422<br>0 | 0     | -1.701 | ILMN_23<br>83807 | CALB2         | 0     | 1.715 |
| ILMN_17<br>46359 | RERG          | 0     | -1.691 | ILMN_17<br>17636 | RGMA          | 0     | 1.71  |
| ILMN_18<br>05228 | LRG1          | 0     | -1.686 | ILMN_17<br>82788 | CSDA          | 0     | 1.71  |
| ILMN_18<br>00942 | KCTD6         | 0     | -1.685 | ILMN_16<br>53824 | LAMC2         | 0     | 1.708 |
| ILMN_16<br>56084 | PDZK1         | 0.075 | -1.68  | ILMN_21<br>36495 | A2ML1         | 0     | 1.707 |
| ILMN_17<br>56469 | GAMT          | 0     | -1.678 | ILMN_17<br>49875 | LOC72871<br>5 | 0     | 1.706 |
| ILMN_16<br>95093 | SLC7A8        | 0     | -1.677 | ILMN_16<br>93218 | ART3          | 0     | 1.698 |
| ILMN_22<br>16637 | STK32B        | 0     | -1.673 | ILMN_18<br>04601 | LOC64992<br>3 | 0.558 | 1.692 |
| ILMN_17<br>16925 | FSIP1         | 0     | -1.673 | ILMN_16<br>63390 | CDC20         | 0     | 1.689 |
| ILMN_20<br>52373 | RAB17         | 0     | -1.667 | ILMN_17<br>37972 | TSPYL5        | 0     | 1.688 |
| ILMN_17<br>81745 | C9ORF15<br>2  | 0     | -1.654 | ILMN_17<br>78991 | NFIB          | 0     | 1.685 |

|                  |               |       |        |                  |               |       |       |
|------------------|---------------|-------|--------|------------------|---------------|-------|-------|
| ILMN_21<br>61848 | GPR81         | 0     | -1.65  | ILMN_17<br>69129 | CCL19         | 0.154 | 1.676 |
| ILMN_17<br>17052 | STARD10       | 0     | -1.646 | ILMN_21<br>63723 | KRT7          | 0     | 1.675 |
| ILMN_17<br>39233 | LOC64887<br>9 | 0     | -1.641 | ILMN_23<br>76205 | LTB           | 0     | 1.674 |
| ILMN_18<br>49013 | HS.57098<br>8 | 0     | -1.64  | ILMN_17<br>13813 | LOC40057<br>8 | 0     | 1.669 |
| ILMN_16<br>51966 | FGFR3         | 0.064 | -1.637 | ILMN_16<br>90096 | PPP1R1B       | 0.638 | 1.667 |
| ILMN_17<br>13995 | SCNN1A        | 0     | -1.634 | ILMN_21<br>95914 | GGH           | 0     | 1.666 |
| ILMN_17<br>36670 | PPP1R3C       | 0     | -1.632 | ILMN_18<br>48552 | HS.37035<br>9 | 0     | 1.664 |
| ILMN_23<br>58760 | HPN           | 0     | -1.631 | ILMN_17<br>78087 | ANXA8         | 0     | 1.658 |
| ILMN_16<br>57760 | SYT17         | 0     | -1.63  | ILMN_18<br>10978 | MUCL1         | 7.691 | 1.651 |
| ILMN_17<br>98108 | C6ORF21<br>1  | 0     | -1.628 | ILMN_17<br>75016 | MPZL2         | 0     | 1.648 |
| ILMN_17<br>01918 | KLHDC9        | 0     | -1.623 | ILMN_21<br>65753 | HLA-<br>A29.1 | 1.562 | 1.648 |
| ILMN_17<br>23709 | C9ORF11<br>6  | 0     | -1.621 | ILMN_20<br>73758 | MMP12         | 0     | 1.643 |
| ILMN_18<br>52022 | KIAA1881      | 0.073 | -1.621 | ILMN_18<br>02615 | CDK6          | 0     | 1.639 |
| ILMN_17<br>89567 | MAGED2        | 0     | -1.62  | ILMN_17<br>08778 | ASS1          | 0     | 1.633 |
| ILMN_17<br>26743 | MRPS30        | 0     | -1.62  | ILMN_17<br>54795 | FAT1          | 0     | 1.632 |
| ILMN_23<br>16955 | SERPINA1<br>1 | 0     | -1.616 | ILMN_17<br>36760 | KRT16         | 0     | 1.632 |

|                  |         |       |        |                  |               |       |       |
|------------------|---------|-------|--------|------------------|---------------|-------|-------|
| ILMN_16<br>67711 | HRASLS3 | 0     | -1.607 | ILMN_17<br>34929 | BBOX1         | 0     | 1.628 |
| ILMN_17<br>84985 | PRRT3   | 0     | -1.602 | ILMN_21<br>09489 | GZMB          | 0     | 1.626 |
| ILMN_22<br>17601 | ANXA9   | 0     | -1.602 | ILMN_17<br>29216 | CRYAB         | 0.066 | 1.626 |
| ILMN_17<br>63704 | RGS11   | 0     | -1.598 | ILMN_17<br>06434 | LOC44035<br>9 | 0     | 1.625 |
| ILMN_18<br>01119 | BCL2    | 0     | -1.597 | ILMN_20<br>63168 | MALL          | 0     | 1.624 |
| ILMN_17<br>91678 | TAT     | 0.372 | -1.597 | ILMN_23<br>01083 | UBE2C         | 0     | 1.623 |
| ILMN_17<br>49478 | TCEAL3  | 0     | -1.593 | ILMN_16<br>91410 | BAMBI         | 0.158 | 1.619 |
| ILMN_17<br>19599 | SYTL4   | 0     | -1.592 | ILMN_21<br>05441 | IGJ           | 0.583 | 1.616 |
| ILMN_17<br>31237 | CLSTN2  | 0     | -1.588 | ILMN_18<br>01939 | CCNB2         | 0     | 1.61  |
| ILMN_17<br>30622 | EVL     | 0     | -1.588 | ILMN_17<br>14335 | RDH10         | 0     | 1.609 |
| ILMN_16<br>72122 | P4HTM   | 0     | -1.583 | ILMN_16<br>80453 | ITM2C         | 0     | 1.604 |
| ILMN_23<br>65465 | XBP1    | 0     | -1.581 | ILMN_18<br>05737 | PFKP          | 0     | 1.604 |
| ILMN_16<br>97561 | FBXL16  | 0     | -1.578 | ILMN_18<br>08707 | FSCN1         | 0     | 1.602 |
| ILMN_22<br>81786 | RTN1    | 0     | -1.573 | ILMN_17<br>63907 | C6ORF17<br>3  | 0     | 1.601 |
| ILMN_16<br>56920 | CRIP1   | 0     | -1.566 | ILMN_16<br>95891 | LOC65277<br>5 | 0.063 | 1.6   |
| ILMN_17<br>47546 | TSPAN1  | 0     | -1.562 | ILMN_17<br>75170 | MT1X          | 0     | 1.596 |

|                  |               |       |        |                  |               |       |       |
|------------------|---------------|-------|--------|------------------|---------------|-------|-------|
| ILMN_16<br>88022 | CST5          | 0.164 | -1.562 | ILMN_16<br>60806 | CSRP2         | 0     | 1.595 |
| ILMN_17<br>67351 | AR            | 0     | -1.556 | ILMN_17<br>96316 | MMP9          | 0.199 | 1.595 |
| ILMN_17<br>38989 | GOLSYN        | 0     | -1.556 | ILMN_17<br>35438 | GPM6B         | 0     | 1.593 |
| ILMN_23<br>98403 | TCEAL1        | 0     | -1.555 | ILMN_16<br>83664 | LOC65036<br>9 | 0     | 1.588 |
| ILMN_16<br>77108 | CAPN13        | 0.075 | -1.553 | ILMN_17<br>50748 | MGC1029<br>66 | 0     | 1.588 |
| ILMN_17<br>00652 | CHAD          | 0     | -1.546 | ILMN_17<br>31640 | MGC3990<br>0  | 0     | 1.588 |
| ILMN_17<br>36939 | UGCG          | 0     | -1.542 | ILMN_17<br>15684 | LAMB3         | 0     | 1.586 |
| ILMN_17<br>65636 | FLJ22184      | 0     | -1.54  | ILMN_17<br>45356 | CXCL9         | 0.506 | 1.586 |
| ILMN_17<br>89112 | TMEM14<br>5   | 0     | -1.54  | ILMN_16<br>87387 | MGST1         | 0     | 1.584 |
| ILMN_16<br>94778 | LOC64672<br>3 | 0     | -1.539 | ILMN_18<br>93633 | LOC43994<br>9 | 0     | 1.583 |
| ILMN_17<br>72686 | FGD3          | 0     | -1.539 | ILMN_16<br>99695 | TNFRSF21      | 0     | 1.571 |
| ILMN_17<br>67129 | ABCC8         | 0     | -1.537 | ILMN_16<br>77505 | CCL21         | 0     | 1.57  |
| ILMN_17<br>83690 | LOC38874<br>3 | 0     | -1.536 | ILMN_16<br>79809 | GSTP1         | 0     | 1.567 |
| ILMN_17<br>00831 | SLC27A2       | 0     | -1.535 | ILMN_17<br>74265 | C2ORF82       | 0     | 1.562 |
| ILMN_22<br>94976 | RNASE4        | 0     | -1.53  | ILMN_23<br>53054 | KLK5          | 0.114 | 1.562 |
| ILMN_16<br>72124 | C4ORF18       | 0     | -1.527 | ILMN_23<br>42579 | IL7R          | 0     | 1.561 |

|                  |               |       |        |                  |               |       |       |
|------------------|---------------|-------|--------|------------------|---------------|-------|-------|
| ILMN_17<br>19622 | RABEP1        | 0     | -1.526 | ILMN_17<br>45077 | MIA           | 0     | 1.56  |
| ILMN_18<br>02053 | ZNF91         | 0     | -1.526 | ILMN_17<br>91759 | CXCL10        | 0.266 | 1.551 |
| ILMN_18<br>63962 | HS.20924<br>4 | 0     | -1.526 | ILMN_23<br>84785 | CCNE1         | 0     | 1.549 |
| ILMN_16<br>59610 | TJP3          | 0     | -1.525 | ILMN_16<br>54319 | HAPLN3        | 0     | 1.548 |
| ILMN_16<br>85943 | LOC37529<br>5 | 0     | -1.524 | ILMN_17<br>70725 | AIF1L         | 0     | 1.548 |
| ILMN_21<br>91192 | CYP2B7P1      | 0     | -1.523 | ILMN_16<br>83450 | CDCA5         | 0     | 1.545 |
| ILMN_22<br>20735 | CLEC3A        | 5.796 | -1.518 | ILMN_17<br>40762 | GRB7          | 0     | 1.544 |
| ILMN_16<br>88480 | CCND1         | 0     | -1.517 | ILMN_22<br>12909 | MELK          | 0     | 1.543 |
| ILMN_17<br>33746 | REEP1         | 0     | -1.516 | ILMN_17<br>56071 | MFGE8         | 0     | 1.543 |
| ILMN_18<br>11632 | FMO5          | 0     | -1.515 | ILMN_17<br>33142 | UBE2E3        | 0     | 1.541 |
| ILMN_17<br>04065 | LOC40076<br>8 | 0     | -1.515 | ILMN_16<br>81737 | TMSB15A       | 0     | 1.541 |
| ILMN_16<br>52797 | FAM174B       | 0     | -1.512 | ILMN_17<br>04398 | FZD9          | 0     | 1.54  |
| ILMN_23<br>38565 | DBNDD2        | 0     | -1.507 | ILMN_17<br>43797 | LOC65210<br>2 | 0.154 | 1.54  |
| ILMN_17<br>72588 | C6ORF97       | 0     | -1.505 | ILMN_18<br>01216 | S100P         | 4.426 | 1.54  |
| ILMN_22<br>01580 | GSTM2         | 0.42  | -1.505 | ILMN_17<br>89244 | SOX8          | 0     | 1.537 |
| ILMN_17<br>56093 | TCEAL4        | 0     | -1.502 | ILMN_17<br>19759 | TNC           | 0     | 1.535 |

|                  |        |   |      |                  |              |       |       |
|------------------|--------|---|------|------------------|--------------|-------|-------|
| ILMN_16<br>86562 | KIF13B | 0 | -1.5 | ILMN_18<br>03256 | STOX2        | 0     | 1.534 |
| ILMN_17<br>40234 | GSTO2  | 0 | -1.5 | ILMN_17<br>12112 | RCAN1        | 0     | 1.534 |
| ILMN_18<br>01658 | BMPR1B | 0 | -1.5 | ILMN_17<br>16909 | ADAMDE<br>C1 | 0     | 1.533 |
|                  |        |   |      | ILMN_17<br>60849 | NETO2        | 0     | 1.529 |
|                  |        |   |      | ILMN_16<br>59913 | ISG20        | 0     | 1.527 |
|                  |        |   |      | ILMN_20<br>94061 | IMPA2        | 0     | 1.524 |
|                  |        |   |      | ILMN_21<br>97128 | OSR1         | 0     | 1.524 |
|                  |        |   |      | ILMN_17<br>37650 | DIO2         | 0     | 1.522 |
|                  |        |   |      | ILMN_17<br>57351 | S100A7       | 0.454 | 1.518 |
|                  |        |   |      | ILMN_17<br>77691 | ARL9         | 0     | 1.517 |
|                  |        |   |      | ILMN_17<br>37728 | CDCA3        | 0     | 1.515 |
|                  |        |   |      | ILMN_16<br>82428 | C1ORF59      | 0     | 1.513 |
|                  |        |   |      | ILMN_18<br>02780 | M160         | 0     | 1.513 |
|                  |        |   |      | ILMN_21<br>78226 | KRT86        | 0     | 1.51  |
|                  |        |   |      | ILMN_17<br>59330 | KIF1A        | 0.117 | 1.507 |
|                  |        |   |      |                  |              |       |       |

|  |  |  |  |  |  |  |  |
|--|--|--|--|--|--|--|--|
|  |  |  |  |  |  |  |  |
|  |  |  |  |  |  |  |  |





**DISCOVERY cohort HR+**

Down-regulated

Up-regulated

| Probe_ID         | Gene          | FDR    | Fold Change | Probe_ID         | Gene          | FDR   | Fold Change |
|------------------|---------------|--------|-------------|------------------|---------------|-------|-------------|
| ILMN_18<br>12073 | ATP6V1B<br>1  | 2.117  | -2.457      | ILMN_17<br>56727 | ANKRD30<br>A  | 3.578 | 3.04        |
| ILMN_16<br>85767 | FAM3B         | 0      | -2.359      | ILMN_16<br>97499 | HLA-DRB5      | 6.268 | 2.673       |
| ILMN_17<br>16195 | HIST1H2B<br>G | 0      | -2.327      | ILMN_17<br>28550 | CYP4Z1        | 3.773 | 2.594       |
| ILMN_17<br>90906 | MSMB          | 2.652  | -2.318      | ILMN_16<br>51329 | LOC64636<br>0 | 2.63  | 2.593       |
| ILMN_17<br>51120 | HIST1H4H      | 0      | -2.307      | ILMN_17<br>97170 | CYP4Z2P       | 3.444 | 2.473       |
| ILMN_17<br>59910 | SERPINA5      | 4.045  | -2.218      | ILMN_17<br>82412 | IRX2          | 2.251 | 2.31        |
| ILMN_17<br>57406 | HIST1H1C      | 1.959  | -2.214      | ILMN_17<br>74287 | CFB           | 2.524 | 2.237       |
| ILMN_16<br>96731 | LOC65268<br>3 | 0      | -2.21       | ILMN_17<br>63704 | RGS11         | 0     | 2.212       |
| ILMN_16<br>53415 | SPANXA2       | 0      | -2.205      | ILMN_16<br>78535 | ESR1          | 1.983 | 2.063       |
| ILMN_17<br>51607 | FOSB          | 3.418  | -2.183      | ILMN_18<br>53592 | TFAP2B        | 4.075 | 2.054       |
| ILMN_17<br>22489 | TFF1          | 12.197 | -2.178      | ILMN_17<br>51034 | ITPRIPL2      | 0     | 1.962       |

|                  |                |        |        |                  |               |        |       |
|------------------|----------------|--------|--------|------------------|---------------|--------|-------|
| ILMN_16<br>69523 | FOS            | 4.359  | -2.113 | ILMN_21<br>39761 | LIMCH1        | 0      | 1.96  |
| ILMN_16<br>59047 | HIST2H2A<br>A3 | 1.225  | -2.068 | ILMN_16<br>57760 | SYT17         | 0      | 1.916 |
| ILMN_17<br>49368 | HIST1H3H       | 0      | -2.059 | ILMN_16<br>77108 | CAPN13        | 1.388  | 1.906 |
| ILMN_17<br>68973 | HIST2H2A<br>C  | 1.7    | -2.047 | ILMN_17<br>15476 | LOC64997<br>0 | 3.896  | 1.891 |
| ILMN_22<br>33319 | SPANXA1        | 0      | -2.041 | ILMN_21<br>91192 | CYP2B7P1      | 3.056  | 1.885 |
| ILMN_17<br>56849 | HIST1H2A<br>E  | 0      | -2     | ILMN_16<br>76990 | LOC33857<br>9 | 13.22  | 1.773 |
| ILMN_17<br>70940 | CDH1           | 2.619  | -1.989 | ILMN_17<br>57019 | NTN4          | 4.439  | 1.764 |
| ILMN_16<br>94817 | TRH            | 0      | -1.968 | ILMN_16<br>69338 | CYP4X1        | 15.603 | 1.745 |
| ILMN_16<br>79299 | IGSF1          | 2.135  | -1.964 | ILMN_16<br>99665 | CLIC6         | 27.821 | 1.741 |
| ILMN_16<br>66845 | KRT17          | 4.05   | -1.952 | ILMN_16<br>96657 | LRRN2         | 3.157  | 1.733 |
| ILMN_22<br>11030 | SPANXB1        | 0      | -1.895 | ILMN_17<br>18934 | LOC72849<br>9 | 1.893  | 1.723 |
| ILMN_17<br>61762 | C6ORF14<br>1   | 1.717  | -1.891 | ILMN_17<br>30039 | IGSF21        | 4.526  | 1.707 |
| ILMN_21<br>05441 | IGJ            | 9.211  | -1.828 | ILMN_16<br>77636 | COMP          | 6.757  | 1.706 |
| ILMN_18<br>10978 | MUCL1          | 30.068 | -1.828 | ILMN_17<br>15169 | HLA-DRB1      | 29.092 | 1.706 |
| ILMN_17<br>95325 | ACTG2          | 5.494  | -1.824 | ILMN_16<br>90096 | PPP1R1B       | 19.399 | 1.7   |
| ILMN_20<br>68104 | TFPI2          | 0      | -1.797 | ILMN_18<br>60003 | HS.34703<br>4 | 1.411  | 1.666 |

|                  |               |       |        |                  |               |        |       |
|------------------|---------------|-------|--------|------------------|---------------|--------|-------|
| ILMN_16<br>65035 | KRT14         | 3.427 | -1.784 | ILMN_17<br>08513 | BNIPL         | 5.827  | 1.665 |
| ILMN_18<br>13314 | HIST1H2B<br>K | 1.571 | -1.78  | ILMN_16<br>67162 | NKX3-1        | 4.819  | 1.656 |
| ILMN_16<br>61078 | LOC64484<br>4 | 8.32  | -1.772 | ILMN_17<br>33746 | REEP1         | 3.977  | 1.652 |
| ILMN_17<br>50234 | PRSS2         | 0     | -1.77  | ILMN_23<br>11873 | GP2           | 12.956 | 1.64  |
| ILMN_17<br>44949 | RHOBTB3       | 2.73  | -1.763 | ILMN_22<br>20735 | CLEC3A        | 39.642 | 1.629 |
| ILMN_21<br>97365 | RGS2          | 2.135 | -1.754 | ILMN_17<br>31922 | LOC64493<br>1 | 1.81   | 1.626 |
| ILMN_17<br>66551 | CPA3          | 4.984 | -1.753 | ILMN_17<br>12522 | CEACAM6       | 32.688 | 1.622 |
| ILMN_17<br>16925 | FSIP1         | 5.186 | -1.752 | ILMN_16<br>96843 | LOC61303<br>7 | 1.365  | 1.618 |
| ILMN_16<br>85699 | PRSS3         | 0     | -1.751 | ILMN_16<br>85433 | COL8A1        | 4.441  | 1.611 |
| ILMN_16<br>69820 | KRT6B         | 5.261 | -1.749 | ILMN_17<br>66405 | GOLM1         | 2.313  | 1.608 |
| ILMN_17<br>88489 | HIST1H3F      | 0     | -1.744 | ILMN_16<br>86562 | KIF13B        | 2.602  | 1.607 |
| ILMN_16<br>80424 | CTSG          | 3.919 | -1.739 | ILMN_17<br>25881 | LOC23117      | 2.007  | 1.603 |
| ILMN_17<br>32781 | SPANXE        | 0     | -1.73  | ILMN_18<br>80280 | HS.54998<br>9 | 2.635  | 1.596 |
| ILMN_17<br>81285 | DUSP1         | 5.646 | -1.726 | ILMN_17<br>23333 | SCGB2A2       | 49.44  | 1.591 |
| ILMN_17<br>56022 | HIST1H2A<br>M | 0     | -1.718 | ILMN_16<br>80110 | C10ORF1<br>16 | 5.472  | 1.585 |
| ILMN_16<br>80618 | MYC           | 2.794 | -1.711 | ILMN_17<br>47839 | ANKRD20<br>A1 | 3.07   | 1.583 |

|                  |          |        |        |                  |               |        |       |
|------------------|----------|--------|--------|------------------|---------------|--------|-------|
| ILMN_16<br>76256 | TPSAB1   | 6.829  | -1.705 | ILMN_17<br>32066 | CKMT1A        | 5.195  | 1.583 |
| ILMN_17<br>98360 | CXCR7    | 2.056  | -1.702 | ILMN_20<br>92077 | PIP           | 46.174 | 1.583 |
| ILMN_16<br>88892 | LAMA3    | 1.937  | -1.692 | ILMN_23<br>98274 | PYCARD        | 3.595  | 1.582 |
| ILMN_16<br>51282 | COL17A1  | 2.396  | -1.683 | ILMN_17<br>63891 | FLJ35258      | 2.464  | 1.576 |
| ILMN_17<br>21127 | HIST1H3D | 0      | -1.665 | ILMN_17<br>67805 | C21ORF8<br>1  | 5.461  | 1.576 |
| ILMN_18<br>92403 | SNORD13  | 3.799  | -1.647 | ILMN_17<br>41648 | HLA-<br>DQB2  | 8.448  | 1.576 |
| ILMN_21<br>88264 | CYR61    | 4.899  | -1.647 | ILMN_18<br>15203 | HMGCS2        | 31.6   | 1.574 |
| ILMN_17<br>62899 | EGR1     | 5.807  | -1.637 | ILMN_22<br>06272 | D2HGDH        | 0      | 1.57  |
| ILMN_21<br>15340 | HIST2H4A | 2.082  | -1.634 | ILMN_17<br>95582 | CHRD          | 3.47   | 1.57  |
| ILMN_17<br>77564 | MAD2L1   | 1.791  | -1.599 | ILMN_17<br>31446 | COL11A1       | 17.482 | 1.568 |
| ILMN_18<br>09590 | GIN52    | 3.385  | -1.598 | ILMN_16<br>77314 | MUC1          | 9.549  | 1.563 |
| ILMN_17<br>75235 | AFF3     | 7.1    | -1.598 | ILMN_23<br>16955 | SERPINA1<br>1 | 9.26   | 1.562 |
| ILMN_17<br>26815 | HIST1H3G | 0      | -1.596 | ILMN_16<br>71766 | F12           | 4.26   | 1.558 |
| ILMN_16<br>83450 | CDCA5    | 3.042  | -1.596 | ILMN_17<br>85900 | LOC65310<br>8 | 11.645 | 1.555 |
| ILMN_16<br>56084 | PDZK1    | 17.357 | -1.594 | ILMN_17<br>52843 | GRM4          | 2.554  | 1.554 |
| ILMN_17<br>63837 | ANPEP    | 7.92   | -1.593 | ILMN_16<br>70099 | NOSTRIN       | 5.009  | 1.545 |

|                  |               |        |        |                  |               |        |       |
|------------------|---------------|--------|--------|------------------|---------------|--------|-------|
| ILMN_17<br>01007 | PON3          | 11.117 | -1.592 | ILMN_20<br>81087 | HSPA12A       | 0      | 1.543 |
| ILMN_16<br>87978 | PHLDA1        | 3.371  | -1.583 | ILMN_17<br>73082 | CYP21A2       | 3.231  | 1.54  |
| ILMN_23<br>53054 | KLK5          | 2.031  | -1.581 | ILMN_23<br>96272 | PDCD4         | 3.113  | 1.539 |
| ILMN_16<br>62619 | TFPI          | 1.542  | -1.58  | ILMN_16<br>94325 | NFIX          | 5.7    | 1.537 |
| ILMN_16<br>74228 | LOC65175<br>1 | 22.548 | -1.58  | ILMN_16<br>97377 | LOC64984<br>1 | 5.637  | 1.535 |
| ILMN_17<br>32071 | HIST2H2B<br>E | 5.717  | -1.579 | ILMN_16<br>55195 | SMA4          | 3.835  | 1.533 |
| ILMN_17<br>70725 | AIF1L         | 1.19   | -1.578 | ILMN_16<br>90304 | MGC2671<br>8  | 6.628  | 1.531 |
| ILMN_16<br>85834 | AMPH          | 2.974  | -1.577 | ILMN_17<br>68772 | DEGS2         | 3.001  | 1.525 |
| ILMN_17<br>78561 | WEE1          | 0      | -1.576 | ILMN_17<br>37561 | LOC88523      | 1.83   | 1.524 |
| ILMN_17<br>67523 | IL17RB        | 5.513  | -1.576 | ILMN_16<br>82288 | LOC72856<br>5 | 4.115  | 1.521 |
| ILMN_16<br>51496 | HIST1H2B<br>D | 7.17   | -1.567 | ILMN_17<br>68311 | LOC72888<br>8 | 1.207  | 1.52  |
| ILMN_18<br>13270 | ELF5          | 8.407  | -1.567 | ILMN_17<br>57106 | 06-Mar        | 2.83   | 1.518 |
| ILMN_16<br>95435 | LOC65361<br>0 | 2.658  | -1.566 | ILMN_16<br>95093 | SLC7A8        | 2.357  | 1.517 |
| ILMN_23<br>74865 | ATF3          | 6.848  | -1.551 | ILMN_17<br>14536 | SCGB1D2       | 54.014 | 1.514 |
| ILMN_16<br>79666 | SCGB3A1       | 26.29  | -1.55  | ILMN_17<br>67351 | AR            | 3.331  | 1.512 |
| ILMN_17<br>39101 | RBBP8         | 3.499  | -1.547 | ILMN_17<br>77644 | PIB5PA        | 4.972  | 1.512 |

|                  |          |        |        |                  |              |        |       |
|------------------|----------|--------|--------|------------------|--------------|--------|-------|
| ILMN_17<br>58067 | RGS4     | 2.108  | -1.544 | ILMN_22<br>16637 | STK32B       | 8.298  | 1.511 |
| ILMN_17<br>08934 | ADM      | 6.312  | -1.539 | ILMN_18<br>05466 | SOX9         | 5.205  | 1.51  |
| ILMN_18<br>06040 | TYMS     | 2.644  | -1.538 | ILMN_16<br>55261 | ERP27        | 12.608 | 1.507 |
| ILMN_16<br>81542 | HIST1H4E | 1.301  | -1.536 | ILMN_18<br>11779 | MGC2410<br>3 | 3.687  | 1.503 |
| ILMN_17<br>21868 | KPNA2    | 2.431  | -1.528 |                  |              |        |       |
| ILMN_17<br>64861 | ISOC1    | 4.936  | -1.527 |                  |              |        |       |
| ILMN_16<br>59027 | SLC2A1   | 1.81   | -1.526 |                  |              |        |       |
| ILMN_23<br>66445 | KRT80    | 4.91   | -1.52  |                  |              |        |       |
| ILMN_21<br>20555 | ADCY1    | 16.182 | -1.52  |                  |              |        |       |
| ILMN_17<br>20829 | ZFP36    | 5.543  | -1.519 |                  |              |        |       |
| ILMN_20<br>72296 | CKS2     | 2.669  | -1.518 |                  |              |        |       |
| ILMN_18<br>09477 | CARHSP1  | 2.467  | -1.517 |                  |              |        |       |
| ILMN_17<br>29686 | OLFM1    | 6.901  | -1.517 |                  |              |        |       |
| ILMN_17<br>91728 | SLC25A25 | 0      | -1.516 |                  |              |        |       |
| ILMN_17<br>95963 | OKL38    | 2.505  | -1.512 |                  |              |        |       |
| ILMN_17<br>20048 | CCL2     | 7.093  | -1.511 |                  |              |        |       |

|                  |          |       |        |  |  |  |  |
|------------------|----------|-------|--------|--|--|--|--|
| ILMN_17<br>58731 | CYP2J2   | 7.167 | -1.508 |  |  |  |  |
| ILMN_17<br>00652 | CHAD     | 9.835 | -1.508 |  |  |  |  |
| ILMN_17<br>93888 | SERPINB5 | 5.965 | -1.5   |  |  |  |  |
| ILMN_17<br>72910 | GAS1     | 6.925 | -1.5   |  |  |  |  |













| VALIDATION cohort HR+ |          |        |             |                  |               |        |             | Up-regulated DEGs<br>In CLUE |
|-----------------------|----------|--------|-------------|------------------|---------------|--------|-------------|------------------------------|
| Down-regulated        |          |        |             | Up-regulated     |               |        |             |                              |
| Probe_ID              | ILMN_Gen | FDR    | Fold Change | Probe_ID         | ILMN_Gen      | FDR    | Fold Change |                              |
| ILMN_16<br>69820      | KRT6B    | 0      | -3.197      | ILMN_16<br>60372 | GRIA2         | 15.93  | 2.918       | IL17RB                       |
| ILMN_18<br>10978      | MUCL1    | 19.388 | -3.129      | ILMN_16<br>78535 | ESR1          | 7.899  | 2.579       | CDH1                         |
| ILMN_16<br>99665      | CLIC6    | 18.066 | -2.767      | ILMN_18<br>52022 | KIAA1881      | 11.058 | 2.39        | FOS                          |
| ILMN_17<br>53101      | VTCN1    | 17.804 | -2.536      | ILMN_16<br>85174 | CPB1          | 33.128 | 2.366       | TYMS                         |
| ILMN_17<br>37650      | DIO2     | 0      | -2.336      | ILMN_21<br>08735 | EEF1A2        | 18.238 | 2.333       | RGS2                         |
| ILMN_16<br>66845      | KRT17    | 12.499 | -2.266      | ILMN_17<br>73006 | FABP4         | 14.677 | 2.246       | TPSAB1                       |
| ILMN_17<br>93888      | SERPINB5 | 0      | -2.261      | ILMN_20<br>66088 | C1ORF64       | 20.101 | 2.211       | ISOC1                        |
| ILMN_16<br>91410      | BAMBI    | 18.218 | -2.221      | ILMN_21<br>74437 | CIDEA         | 13.902 | 2.082       | AMPH                         |
| ILMN_16<br>56837      | RBP1     | 12.962 | -2.169      | ILMN_17<br>30039 | IGSF21        | 11.984 | 1.967       | ZFP36                        |
| ILMN_17<br>95325      | ACTG2    | 14.156 | -2.146      | ILMN_19<br>01921 | HS.57009<br>5 | 24.292 | 1.924       | PRSS3                        |
| ILMN_16<br>87387      | MGST1    | 13.853 | -2.12       | ILMN_16<br>91884 | STC2          | 36.153 | 1.895       | HIST1H1C                     |

|                  |               |        |        |                  |               |        |       |            |
|------------------|---------------|--------|--------|------------------|---------------|--------|-------|------------|
| ILMN_16<br>51282 | COL17A1       | 8.617  | -2.113 | ILMN_23<br>58760 | HPN           | 7.291  | 1.889 | RGS4       |
| ILMN_17<br>13397 | NCCRP1        | 7.291  | -2.079 | ILMN_18<br>11330 | FAM134B       | 12.836 | 1.884 | CPA3       |
| ILMN_20<br>92077 | PIP           | 50.084 | -2.054 | ILMN_18<br>26165 | HS.15926<br>4 | 19.042 | 1.88  | RBBP8      |
| ILMN_17<br>13952 | C1ORF10<br>6  | 11.374 | -2.047 | ILMN_16<br>88022 | CST5          | 28.828 | 1.877 | TFPI2      |
| ILMN_16<br>53824 | LAMC2         | 0      | -2.035 | ILMN_17<br>89112 | TMEM14<br>5   | 15.798 | 1.799 | MYC        |
| ILMN_21<br>63723 | KRT7          | 17.736 | -2.032 | ILMN_21<br>05573 | CCL3L3        | 13.44  | 1.776 | PHLDA1     |
| ILMN_17<br>43620 | RARRES1       | 13.939 | -2.031 | ILMN_17<br>74287 | CFB           | 30.386 | 1.769 | LAMA3      |
| ILMN_17<br>50974 | S100A9        | 29.085 | -2.026 | ILMN_16<br>97499 | HLA-DRB5      | 65.365 | 1.705 | PDZK1      |
| ILMN_17<br>82389 | LAD1          | 15.664 | -2.011 | ILMN_17<br>45501 | DNALI1        | 17.862 | 1.691 | CYR61      |
| ILMN_17<br>23333 | SCGB2A2       | 58.68  | -1.975 | ILMN_17<br>63704 | RGS11         | 18.201 | 1.679 | SERPINA5   |
| ILMN_16<br>86573 | DEFB1         | 10.877 | -1.972 | ILMN_17<br>56469 | GAMT          | 13.329 | 1.669 | ADM        |
| ILMN_17<br>72910 | GAS1          | 12.152 | -1.971 | ILMN_16<br>51966 | FGFR3         | 36.247 | 1.668 | TRH        |
| ILMN_17<br>33142 | UBE2E3        | 8.886  | -1.967 | ILMN_16<br>69114 | WNK4          | 29.344 | 1.665 | CCL2       |
| ILMN_17<br>19759 | TNC           | 12.266 | -1.941 | ILMN_17<br>48057 | LASS4         | 9.805  | 1.65  | HIST2H2AA3 |
| ILMN_23<br>37974 | PKIA          | 8.242  | -1.935 | ILMN_16<br>80110 | C10ORF1<br>16 | 18.818 | 1.649 | KPNA2      |
| ILMN_16<br>52199 | LOC64211<br>3 | 48.443 | -1.931 | ILMN_17<br>57106 | 06-Mar        | 14.307 | 1.648 | HIST1H2BG  |

|                  |               |        |        |                  |               |        |       |           |
|------------------|---------------|--------|--------|------------------|---------------|--------|-------|-----------|
| ILMN_18<br>08245 | RPESP         | 28.801 | -1.926 | ILMN_18<br>00942 | KCTD6         | 12.124 | 1.646 | CHAD      |
| ILMN_17<br>11451 | SLC7A2        | 31.035 | -1.917 | ILMN_17<br>88184 | CIDEA         | 17.176 | 1.64  | ATF3      |
| ILMN_16<br>99214 | LOC64745<br>0 | 47.826 | -1.917 | ILMN_22<br>16637 | STK32B        | 21.141 | 1.635 | HIST2H2BE |
| ILMN_17<br>82788 | CSDA          | 8.817  | -1.912 | ILMN_17<br>77644 | PIB5PA        | 17.453 | 1.634 | DUSP1     |
| ILMN_17<br>57351 | S100A7        | 16.981 | -1.912 | ILMN_23<br>23172 | CSF3R         | 13.823 | 1.633 | GINS2     |
| ILMN_21<br>49164 | SFRP1         | 17.662 | -1.91  | ILMN_16<br>96657 | LRRN2         | 20.465 | 1.603 | EGR1      |
| ILMN_16<br>65035 | KRT14         | 12.363 | -1.905 | ILMN_18<br>35913 | HS.14447<br>9 | 45.255 | 1.6   | SLC2A1    |
| ILMN_21<br>31177 | GUCY1A3       | 8.776  | -1.887 | ILMN_18<br>63962 | HS.20924<br>4 | 24.343 | 1.598 | HIST1H2BK |
| ILMN_16<br>79666 | SCGB3A1       | 29.852 | -1.887 | ILMN_16<br>62587 | PNPLA7        | 18.121 | 1.584 | FOSB      |
| ILMN_18<br>01216 | S100P         | 47.956 | -1.868 | ILMN_24<br>06656 | GATA3         | 22.719 | 1.584 | WEE1      |
| ILMN_21<br>14720 | SLPI          | 16.236 | -1.862 | ILMN_17<br>77190 | CFD           | 31.009 | 1.58  | ADCY1     |
| ILMN_23<br>53054 | KLK5          | 7.899  | -1.853 | ILMN_16<br>57760 | SYT17         | 20.537 | 1.579 | CKS2      |
| ILMN_21<br>05441 | IGJ           | 33.792 | -1.845 | ILMN_16<br>96243 | FLJ23152      | 36.166 | 1.578 | MAD2L1    |
| ILMN_17<br>04294 | CDH3          | 10.208 | -1.839 | ILMN_16<br>78757 | BCYRN1        | 19.611 | 1.57  | HIST1H2BD |
| ILMN_18<br>01442 | KRT81         | 17.119 | -1.836 | ILMN_18<br>88359 | HS.57306<br>2 | 63.184 | 1.57  | MSMB      |
| ILMN_20<br>64860 | LOC65349<br>9 | 0      | -1.832 | ILMN_17<br>11049 | CACNA2D<br>2  | 13.737 | 1.569 | HIST1H2AE |

|                  |               |        |        |                  |               |        |       |        |
|------------------|---------------|--------|--------|------------------|---------------|--------|-------|--------|
| ILMN_17<br>28761 | ERBB2         | 15.475 | -1.823 | ILMN_20<br>69224 | PVALB         | 53.764 | 1.564 | TFPI   |
| ILMN_17<br>40762 | GRB7          | 12.76  | -1.822 | ILMN_16<br>71263 | CACNA1H       | 35.353 | 1.548 | AFF3   |
| ILMN_17<br>39508 | LOC65249<br>3 | 57.432 | -1.805 | ILMN_18<br>98518 | HS.38834<br>7 | 55.566 | 1.548 | ITM2C  |
| ILMN_16<br>80339 | PDGFRL        | 12.789 | -1.803 | ILMN_22<br>27968 | NTHL1         | 9.293  | 1.544 | LCN2   |
| ILMN_16<br>58569 | LOC72891<br>0 | 0      | -1.794 | ILMN_17<br>38552 | SLC1A3        | 12.31  | 1.537 | PKIA   |
| ILMN_16<br>59631 | LOC73002<br>4 | 21.963 | -1.787 | ILMN_21<br>91192 | CYP2B7P1      | 33.231 | 1.535 | CDH3   |
| ILMN_21<br>61820 | GLYATL2       | 15.569 | -1.785 | ILMN_22<br>12999 | KIF5C         | 37.53  | 1.534 | PSAT1  |
| ILMN_17<br>86720 | PROM1         | 32.079 | -1.775 | ILMN_24<br>13780 | SEZ6L2        | 45.348 | 1.531 | FOXC1  |
| ILMN_17<br>06434 | LOC44035<br>9 | 8.617  | -1.771 | ILMN_17<br>84985 | PRRT3         | 15.465 | 1.529 | FUT3   |
| ILMN_17<br>75170 | MT1X          | 13.541 | -1.761 | ILMN_16<br>93367 | TPD52         | 22.001 | 1.528 | RAB38  |
| ILMN_18<br>13270 | ELF5          | 20.072 | -1.755 | ILMN_17<br>65966 | CHGB          | 59.619 | 1.528 | ACTA2  |
| ILMN_17<br>26030 | GPX7          | 7.685  | -1.754 | ILMN_16<br>76990 | LOC33857<br>9 | 61.577 | 1.527 | CALML3 |
| ILMN_16<br>77920 | LTF           | 48.142 | -1.751 | ILMN_16<br>73521 | KISS1R        | 21.42  | 1.522 | FABP5  |
| ILMN_16<br>80274 | LOC65269<br>4 | 53.315 | -1.748 | ILMN_17<br>79416 | SCUBE2        | 64.333 | 1.522 | LAMB3  |
| ILMN_17<br>58731 | CYP2J2        | 15.979 | -1.737 | ILMN_16<br>88228 | LOC14583<br>7 | 29.425 | 1.52  | PMEPA1 |
| ILMN_17<br>04842 | ARL4A         | 7.583  | -1.73  | ILMN_16<br>77695 | KIAA1530      | 15.798 | 1.519 | VCAN   |



|                  |              |        |        |                  |               |        |       |         |
|------------------|--------------|--------|--------|------------------|---------------|--------|-------|---------|
| ILMN_17<br>37972 | TSPYL5       | 14.362 | -1.728 | ILMN_21<br>05960 | KIF12         | 19.327 | 1.519 | TSPAN8  |
| ILMN_17<br>28132 | LDHB         | 15.924 | -1.718 | ILMN_17<br>64309 | ADH1A         | 42.211 | 1.518 | CCNO    |
| ILMN_17<br>85699 | PTHLH        | 16.647 | -1.713 | ILMN_17<br>95063 | ZADH2         | 14.19  | 1.516 | GGH     |
| ILMN_17<br>07339 | BTG3         | 8.617  | -1.707 | ILMN_18<br>60003 | HS.34703<br>4 | 17.029 | 1.516 | SPATS2L |
| ILMN_17<br>68953 | SDC1         | 15.454 | -1.707 | ILMN_16<br>90442 | C18ORF4<br>5  | 15.735 | 1.515 | TSPYL5  |
| ILMN_16<br>92938 | PSAT1        | 9.027  | -1.706 | ILMN_17<br>23035 | OLR1          | 21.365 | 1.51  | MPZL2   |
| ILMN_16<br>93270 | SUSD2        | 18.311 | -1.702 | ILMN_17<br>47839 | ANKRD20<br>A1 | 23.987 | 1.508 | PTHLH   |
| ILMN_20<br>53103 | SLC40A1      | 25.831 | -1.701 | ILMN_16<br>61895 | PI15          | 42.602 | 1.508 | PAM     |
| ILMN_17<br>15684 | LAMB3        | 9.479  | -1.7   | ILMN_17<br>24424 | PRRT2         | 21.254 | 1.504 | LUM     |
| ILMN_21<br>34974 | RAB38        | 17.146 | -1.694 | ILMN_21<br>43822 | ZNF148        | 13.208 | 1.503 | C1S     |
| ILMN_17<br>51028 | SERPINH1     | 7.483  | -1.688 | ILMN_16<br>97561 | FBXL16        | 23.866 | 1.501 | CDK6    |
| ILMN_23<br>95496 | KLK7         | 0      | -1.685 |                  |               |        |       | KLK6    |
| ILMN_17<br>69388 | GJB2         | 19.965 | -1.685 |                  |               |        |       | PDGFRL  |
| ILMN_17<br>66637 | GLA          | 14.218 | -1.684 |                  |               |        |       | GUCY1A3 |
| ILMN_16<br>89146 | GABRP        | 15.927 | -1.681 |                  |               |        |       | TUSC3   |
| ILMN_20<br>73446 | C1ORF11<br>6 | 18.424 | -1.677 |                  |               |        |       | CALML5  |

|                  |         |        |        |  |  |  |  |          |
|------------------|---------|--------|--------|--|--|--|--|----------|
| ILMN_21<br>46766 | FABP5   | 15.459 | -1.666 |  |  |  |  | CST6     |
| ILMN_22<br>19002 | KRT6A   | 9.479  | -1.663 |  |  |  |  | TUBB3    |
| ILMN_16<br>81949 | PDGFRA  | 9.977  | -1.662 |  |  |  |  | TMEM158  |
| ILMN_17<br>78087 | ANXA8   | 8.125  | -1.661 |  |  |  |  | LAD1     |
| ILMN_17<br>15463 | SOSTDC1 | 9.027  | -1.66  |  |  |  |  | LOX      |
| ILMN_16<br>87301 | VCAN    | 17.717 | -1.657 |  |  |  |  | GABRP    |
| ILMN_17<br>28049 | S100A16 | 15.988 | -1.654 |  |  |  |  | KHDRBS3  |
| ILMN_24<br>13323 | GRP     | 29.098 | -1.654 |  |  |  |  | CX3CL1   |
| ILMN_16<br>85767 | FAM3B   | 19.412 | -1.652 |  |  |  |  | FBLN2    |
| ILMN_17<br>75016 | MPZL2   | 12.884 | -1.647 |  |  |  |  | TNC      |
| ILMN_17<br>35438 | GPM6B   | 7.899  | -1.646 |  |  |  |  | AMMECR1  |
| ILMN_16<br>60549 | GPR177  | 16.747 | -1.646 |  |  |  |  | PGAP3    |
| ILMN_17<br>16988 | OPN3    | 8.425  | -1.644 |  |  |  |  | SCGB2A2  |
| ILMN_17<br>90160 | KIT     | 12.891 | -1.642 |  |  |  |  | SPON1    |
| ILMN_22<br>62288 | EEF1G   | 16.688 | -1.642 |  |  |  |  | SERPINH1 |
| ILMN_16<br>82781 | TEAD2   | 17.205 | -1.642 |  |  |  |  | LDHB     |

|                  |          |        |        |  |  |  |  |         |
|------------------|----------|--------|--------|--|--|--|--|---------|
| ILMN_16<br>61708 | LGALS7   | 0      | -1.638 |  |  |  |  | BAMBI   |
| ILMN_20<br>76600 | ITM2A    | 22.546 | -1.638 |  |  |  |  | MT1X    |
| ILMN_17<br>21769 | FBLN2    | 18.41  | -1.634 |  |  |  |  | RBP1    |
| ILMN_16<br>56713 | IGLL1    | 60.242 | -1.634 |  |  |  |  | MMP10   |
| ILMN_17<br>73459 | SOX11    | 13.101 | -1.626 |  |  |  |  | MALL    |
| ILMN_16<br>92223 | LCN2     | 27.278 | -1.626 |  |  |  |  | FMO1    |
| ILMN_17<br>90529 | LUM      | 40.809 | -1.626 |  |  |  |  | LAMC2   |
| ILMN_17<br>22898 | SFRP2    | 36.417 | -1.62  |  |  |  |  | SNAI2   |
| ILMN_16<br>72608 | PPAP2B   | 13.961 | -1.619 |  |  |  |  | UBE2E3  |
| ILMN_16<br>54072 | CX3CL1   | 16.162 | -1.618 |  |  |  |  | RARRES1 |
| ILMN_16<br>55740 | SNAI2    | 10.367 | -1.614 |  |  |  |  | FASN    |
| ILMN_18<br>01632 | KRT5     | 12.971 | -1.611 |  |  |  |  | SPARCL1 |
| ILMN_18<br>05636 | PGAP3    | 16.806 | -1.61  |  |  |  |  | RCAN1   |
| ILMN_17<br>22489 | TFF1     | 70.362 | -1.609 |  |  |  |  | FAT1    |
| ILMN_18<br>02654 | GLT8D2   | 15.603 | -1.608 |  |  |  |  | DIO2    |
| ILMN_18<br>43198 | HS.10862 | 18.237 | -1.608 |  |  |  |  | PIP     |

|                  |               |        |        |  |  |  |  |         |
|------------------|---------------|--------|--------|--|--|--|--|---------|
| ILMN_17<br>34276 | PMEPA1        | 14.218 | -1.607 |  |  |  |  | ARL4A   |
| ILMN_17<br>80255 | KLK6          | 5.576  | -1.605 |  |  |  |  | LTF     |
| ILMN_17<br>74689 | TUSC3         | 18.33  | -1.605 |  |  |  |  | PI3     |
| ILMN_16<br>59913 | ISG20         | 15.73  | -1.604 |  |  |  |  | KIT     |
| ILMN_17<br>57099 | C10ORF8<br>1  | 21.762 | -1.6   |  |  |  |  | SOSTDC1 |
| ILMN_16<br>82428 | C1ORF59       | 16.08  | -1.596 |  |  |  |  | GPX7    |
| ILMN_17<br>68469 | TCN1          | 67.617 | -1.595 |  |  |  |  | DEFB1   |
| ILMN_17<br>95251 | SPARCL1       | 22.257 | -1.594 |  |  |  |  | GRP     |
| ILMN_16<br>76822 | C2ORF40       | 17.087 | -1.593 |  |  |  |  | PDGFRA  |
| ILMN_17<br>31640 | MGC3990<br>0  | 13.317 | -1.592 |  |  |  |  | KRT6A   |
| ILMN_17<br>38401 | FOXC1         | 16.103 | -1.589 |  |  |  |  | GLT8D2  |
| ILMN_16<br>83678 | SPATS2L       | 12.472 | -1.587 |  |  |  |  | KYNU    |
| ILMN_17<br>53954 | OLFM4         | 21.289 | -1.587 |  |  |  |  | TCN1    |
| ILMN_17<br>54795 | FAT1          | 13.34  | -1.584 |  |  |  |  | SFRP1   |
| ILMN_18<br>81909 | HS.57963<br>1 | 42.407 | -1.584 |  |  |  |  | VTCN1   |
| ILMN_17<br>84871 | FASN          | 18.914 | -1.581 |  |  |  |  | CLDN8   |

|                  |               |        |        |  |  |  |  |         |
|------------------|---------------|--------|--------|--|--|--|--|---------|
| ILMN_16<br>74620 | SGCE          | 25.57  | -1.581 |  |  |  |  | GLA     |
| ILMN_17<br>83244 | TNFRSF19      | 17.093 | -1.579 |  |  |  |  | KRT81   |
| ILMN_18<br>02615 | CDK6          | 11.528 | -1.578 |  |  |  |  | DSC2    |
| ILMN_17<br>01007 | PON3          | 38.118 | -1.578 |  |  |  |  | KLK7    |
| ILMN_20<br>72568 | CLDN8         | 19.571 | -1.571 |  |  |  |  | POSTN   |
| ILMN_17<br>92455 | TMEM15<br>8   | 22.965 | -1.57  |  |  |  |  | OLFM4   |
| ILMN_16<br>76631 | CCNO          | 25.381 | -1.569 |  |  |  |  | PROM1   |
| ILMN_17<br>18863 | KCNK1         | 34.262 | -1.569 |  |  |  |  | SLC7A5  |
| ILMN_17<br>29801 | S100A8        | 52.255 | -1.569 |  |  |  |  | TMEM45A |
| ILMN_16<br>84401 | FMO1          | 13.139 | -1.568 |  |  |  |  | OPN3    |
| ILMN_16<br>63575 | MGC8704<br>2  | 22.404 | -1.566 |  |  |  |  | BTG3    |
| ILMN_17<br>51161 | COL7A1        | 15.485 | -1.565 |  |  |  |  | GPM6B   |
| ILMN_21<br>95914 | GGH           | 25.998 | -1.563 |  |  |  |  | SLPI    |
| ILMN_16<br>83664 | LOC65036<br>9 | 16.996 | -1.562 |  |  |  |  | APP     |
| ILMN_23<br>13901 | PAM           | 17.808 | -1.561 |  |  |  |  | IGLL1   |
| ILMN_17<br>41847 | MMP10         | 12.064 | -1.556 |  |  |  |  | KRT5    |

|                  |               |        |        |  |  |  |  |        |
|------------------|---------------|--------|--------|--|--|--|--|--------|
| ILMN_17<br>31206 | NKD2          | 18.737 | -1.556 |  |  |  |  | SOX11  |
| ILMN_17<br>25338 | CLDN23        | 12.574 | -1.555 |  |  |  |  | ITM2A  |
| ILMN_17<br>46517 | KYNU          | 32.059 | -1.546 |  |  |  |  | MYLK   |
| ILMN_22<br>29877 | PCDH18        | 14.582 | -1.545 |  |  |  |  | CTSK   |
| ILMN_17<br>91890 | SPON1         | 23.919 | -1.545 |  |  |  |  | KRT7   |
| ILMN_17<br>49118 | CALML5        | 55.273 | -1.545 |  |  |  |  | GRB7   |
| ILMN_17<br>12112 | RCAN1         | 18.288 | -1.541 |  |  |  |  | SGCE   |
| ILMN_16<br>77603 | C1S           | 27.658 | -1.541 |  |  |  |  | SLC7A2 |
| ILMN_23<br>64768 | MYLK          | 12.809 | -1.54  |  |  |  |  | ERBB2  |
| ILMN_21<br>96328 | POSTN         | 39.749 | -1.539 |  |  |  |  | KCNK1  |
| ILMN_16<br>76765 | LOC39035<br>4 | 18.774 | -1.536 |  |  |  |  | SDC1   |
| ILMN_20<br>63168 | MALL          | 9.977  | -1.533 |  |  |  |  |        |
| ILMN_17<br>33333 | CALML3        | 13.837 | -1.533 |  |  |  |  |        |
| ILMN_17<br>70922 | TMEM45<br>A   | 22.894 | -1.531 |  |  |  |  |        |
| ILMN_16<br>74228 | LOC65175<br>1 | 61.832 | -1.531 |  |  |  |  |        |
| ILMN_16<br>53358 | FUT3          | 6.319  | -1.526 |  |  |  |  |        |

|                  |               |        |        |  |  |  |  |
|------------------|---------------|--------|--------|--|--|--|--|
| ILMN_18<br>05737 | PFKP          | 18.865 | -1.524 |  |  |  |  |
| ILMN_16<br>70506 | AMMECR<br>1   | 7.109  | -1.523 |  |  |  |  |
| ILMN_17<br>27790 | KHDRBS3       | 13.748 | -1.521 |  |  |  |  |
| ILMN_16<br>71703 | ACTA2         | 17.206 | -1.521 |  |  |  |  |
| ILMN_16<br>63119 | DSC2          | 15.644 | -1.52  |  |  |  |  |
| ILMN_16<br>95034 | LOC64281<br>7 | 19.474 | -1.52  |  |  |  |  |
| ILMN_17<br>91726 | TUBB3         | 31.643 | -1.52  |  |  |  |  |
| ILMN_23<br>66445 | KRT80         | 20.112 | -1.516 |  |  |  |  |
| ILMN_17<br>58895 | CTSK          | 33.229 | -1.516 |  |  |  |  |
| ILMN_17<br>20373 | SLC7A5        | 29.376 | -1.515 |  |  |  |  |
| ILMN_16<br>93192 | PI3           | 12.174 | -1.513 |  |  |  |  |
| ILMN_17<br>16382 | LOC38788<br>2 | 21.387 | -1.513 |  |  |  |  |
| ILMN_24<br>04065 | APP           | 23.73  | -1.512 |  |  |  |  |
| ILMN_16<br>98666 | CST6          | 25.077 | -1.511 |  |  |  |  |
| ILMN_17<br>85732 | TNFAIP6       | 18.054 | -1.509 |  |  |  |  |
| ILMN_16<br>80453 | ITM2C         | 20.062 | -1.509 |  |  |  |  |

|                  |        |        |        |  |  |  |  |
|------------------|--------|--------|--------|--|--|--|--|
| ILMN_16<br>73522 | MOCOS  | 15.941 | -1.505 |  |  |  |  |
| ILMN_18<br>02888 | ZNF185 | 15.384 | -1.503 |  |  |  |  |
| ILMN_16<br>95880 | LOX    | 15.734 | -1.502 |  |  |  |  |
| ILMN_16<br>83263 | TSPAN8 | 22.043 | -1.501 |  |  |  |  |
