# Supplementary material for: A novel age-related gene expression signature associates with proliferation and disease progression in breast cancer
Source: PubMed Central journal article supplement (PMC9643541; doi:10.1038/s41416-022-01953-w), 2022-08-23
Supplement: 41416_2022_1953_MOESM2_ESM.pdf [file 41416_2022_1953_MOESM2_ESM.pdf]

**Supplementary Table 2:** Gene Sets enriched in the <40 group for METABRIC cohorts.  
FDR cutoff < 10 % (FDR cutoff < 5% for GO/BP).

| Categories           | Systematic name | Gene set                            | False Discovery Rate(%) |
|----------------------|-----------------|-------------------------------------|-------------------------|
| Oncogenic signatures | M2757           | MTOR_UP.N4.V1_UP                    | 0.16                    |
|                      | M2728           | RAF_UP.V1_UP                        | 1.5                     |
|                      | M2876           | KRAS.50_UP.V1_DN                    | 1.54                    |
|                      | M2848           | HOXA9_DN.V1_DN                      | 1.55                    |
|                      | M2822           | IL2_UP.V1_UP                        | 1.56                    |
|                      | M2675           | VEGF_A_UP.V1_DN                     | 2.64                    |
|                      | M2669           | AKT_UP.V1_UP                        | 3.97                    |
|                      | M2664           | AKT_UP_MTOR_DN.V1_DN                | 4.02                    |
|                      | M2861           | KRAS.DF.V1_DN                       | 4.17                    |
|                      | M2880           | KRAS.600_UP.V1_DN                   | 4.64                    |
|                      | M2708           | MYC_UP.V1_DN                        | 5.7                     |
|                      | M2874           | KRAS.300_UP.V1_DN                   | 6.18                    |
|                      | M2672           | MTOR_UP.V1_UP                       | 6.81                    |
|                      | M2698           | P53_DN.V1_UP                        | 7.8                     |
|                      | M2634           | EGFR_UP.V1_UP                       | 7.91                    |
| Hallmark gene sets   | M5924           | HALLMARK_MTORC1_SIGNALING           | 0.22                    |
|                      | M5901           | HALLMARK_G2M_CHECKPOINT             | 0.25                    |
|                      | M5926           | HALLMARK_MYC_TARGETS_V1             | 0.41                    |
|                      | M5922           | HALLMARK_UNFOLDED_PROTEIN_RESPONSE  | 1.06                    |
|                      | M5951           | HALLMARK_SPERMATOGENESIS            | 1.32                    |
|                      | M5928           | HALLMARK_MYC_TARGETS_V2             | 1.53                    |
|                      | M5893           | HALLMARK_MITOTIC_SPINDLE            | 1.67                    |
|                      | M5892           | HALLMARK_CHOLESTEROL_HOMEOSTASIS    | 4.45                    |
|                      | M5925           | HALLMARK_E2F_TARGETS                | 4.47                    |
|                      | M5937           | HALLMARK_GLYCOLYSIS                 | 5.48                    |
|                      | M5891           | HALLMARK_HYPOXIA                    | 5.93                    |
|                      | M5903           | HALLMARK_NOTCH_SIGNALING            | 6.03                    |
|                      | M5890           | HALLMARK_TNFA_SIGNALING_VIA_NFKB    | 6.1                     |
|                      | M5923           | HALLMARK_PI3K_AKT_MTOR_SIGNALING    | 9.1                     |
|                      | M5947           | HALLMARK_IL2_STAT3_SIGNALING        | 9.56                    |
|                      | M13413          | GO_CELL_CYCLE_G1_S_PHASE_TRANSITION | 0.66                    |
|                      | M15083          | GO_REGULATION_OF_NUCLEAR_DIVISION   | 1.55                    |
|                      | M12894          | GO_REGULATION_OF_EXIT_FROM_MITOSIS  | 1.66                    |
|                      | M16660          | GO_NUCLEAR_CHROMOSOME_SEGREGATION   | 1.66                    |
|                      | M11467          | GO_REGULATION_OF_EXIT_FROM_MITOSIS  | 1.66                    |
|                      | M10642          | GO_DNA_DEPENDENT_DNA_REPLICATION    | 1.66                    |

|                         |        |                                              |      |
|-------------------------|--------|----------------------------------------------|------|
| GO Biological Processes | M15372 | GO_REGULATION_OF_CELL_CYCLE_PHASE_TRANSITION | 1.68 |
|                         | M11012 | GO_REGULATION_OF_CELL_CYCLE_PHASE_TRANSITION | 1.68 |
|                         | M12981 | GO_SISTER_CHROMATID_SEGREGATION              | 1.73 |
|                         | M11049 | GO_POSITIVE_REGULATION_OF_MITOTIC_CELL_CYCLE | 1.75 |
|                         | M25378 | GO_REGULATION_OF_CHROMOSOME_SEPARATION       | 1.85 |
|                         | M14993 | GO_MEIOTIC_CELL_CYCLE_PROCESS                | 1.97 |
|                         | M13340 | GO_POSITIVE_REGULATION_OF_CELL_CYCLE_PROCESS | 1.98 |
|                         | M1332  | GO_MITOTIC_NUCLEAR_DIVISION                  | 1.99 |
|                         | M16076 | GO_POSITIVE_REGULATION_OF_CELL_CYCLE         | 3.23 |
| KEGG                    | M7963  | KEGG_CELL_CYCLE                              | 0.14 |
|                         | M15902 | KEGG_GLYCEROLIPID_METABOLISM                 | 1.78 |
|                         | M1835  | KEGG_GLIOMA                                  | 1.92 |
|                         | M6370  | KEGG_P53_SIGNALING_PATHWAY                   | 2.13 |
|                         | M19818 | KEGG_NON_SMALL_CELL_LUNG_CANCER              | 2.65 |
|                         | M16853 | KEGG_DNA_REPLICATION                         | 2.7  |
|                         | M3578  | KEGG_PROGESTERONE_MEDIATED_OOCYTE_MATURATION | 4.3  |
|                         | M2164  | KEGG_LEUKOCYTE_TRANSENDOTHELIAL_MIGRATION    | 4.76 |
|                         | M12467 | KEGG_ERBB_SIGNALING_PATHWAY                  | 4.98 |
|                         | M16817 | KEGG_OOCYTE_MEIOSIS                          | 5.08 |
|                         | M15798 | KEGG_MELANOMA                                | 5.47 |
|                         | M4377  | KEGG_GALACTOSE_METABOLISM                    | 5.65 |
|                         | M4013  | KEGG_GAP_JUNCTION                            | 5.9  |
|                         | M10680 | KEGG_PROTEASOME                              | 7.03 |
|                         | M10911 | KEGG_CYSTEINE_AND_METHIONINE_METABOLISM      | 8.16 |
