# Supplementary material for: A novel age-related gene expression signature associates with proliferation and disease progression in breast cancer
Source: PubMed Central journal article supplement (PMC9643541; doi:10.1038/s41416-022-01953-w), 2022-08-23
Supplement: 41416_2022_1953_MOESM3_ESM.pdf [file 41416_2022_1953_MOESM3_ESM.pdf]

**Supplementary Table 3:** REACTOME knowledgebase.

The top 20 most significantly enriched pathways.

| Pathway identifier | Pathway name                                                                      | P value  | Submitted entities                                                                                 |
|--------------------|-----------------------------------------------------------------------------------|----------|----------------------------------------------------------------------------------------------------|
| R-HSA-69278        | Cell Cycle, Mitotic                                                               | 1.11E-16 | CDCA5;CDCA8;MCM10;TYMS;CENPA;AURKA;CDC20;CCNB2;CDC45;PTTG1;CCNE1;CDK1;BIRC5;KIF2C;CENPN;BUB1       |
| R-HSA-1640170      | Cell Cycle                                                                        | 1.11E-16 | CENPW;CDCA5;CDCA8;MCM10;TYMS;CENPA;AURKA;CDC20;CCNB2;CDC45;PTTG1;CCNE1;CDK1;BIRC5;KIF2C;CENPN;BUB1 |
| R-HSA-2500257      | Resolution of Sister Chromatid Cohesion                                           | 2.00E-15 | CDC20;CCNB2;CDCA5;CDK1;BIRC5;CDCA8;KIF2C;CENPN;CENPA;BUB1                                          |
| R-HSA-69620        | Cell Cycle Checkpoints                                                            | 1.77E-14 | CDC20;CCNB2;CDC45;CCNE1;CDK1;BIRC5;CDCA8;KIF2C;MCM10;CENPN;CENPA;BUB1                              |
| R-HSA-68882        | Mitotic Anaphase                                                                  | 1.05E-13 | CDC20;CCNB2;PTTG1;CDCA5;CDK1;BIRC5;CDCA8;KIF2C;CENPN;CENPA;BUB1                                    |
| R-HSA-2555396      | Mitotic Metaphase and Anaphase                                                    | 1.10E-13 | CDC20;CCNB2;PTTG1;CDCA5;CDK1;BIRC5;CDCA8;KIF2C;CENPN;CENPA;BUB1                                    |
| R-HSA-68877        | Mitotic Prometaphase                                                              | 4.04E-13 | CDC20;CCNB2;CDCA5;CDK1;BIRC5;CDCA8;KIF2C;CENPN;CENPA;BUB1                                          |
| R-HSA-69205        | G1/S-Specific Transcription                                                       | 4.65E-13 | CDC45;CCNE1;CDK1;TYMS                                                                              |
| R-HSA-2467813      | Separation of Sister Chromatids                                                   | 4.83E-12 | CDC20;PTTG1;CDCA5;BIRC5;CDCA8;KIF2C;CENPN;CENPA;BUB1                                               |
| R-HSA-141444       | Amplification of signal from unattached kinetochores via a MAD2 inhibitory signal | 5.14E-12 | CDC20;BIRC5;CDCA8;KIF2C;CENPN;CENPA;BUB1                                                           |
| R-HSA-141424       | Amplification of signal from the kinetochores                                     | 5.14E-12 | CDC20;BIRC5;CDCA8;KIF2C;CENPN;CENPA;BUB1                                                           |
| R-HSA-69206        | G1/S Transition                                                                   | 1.01E-11 | CDC45;CCNE1;CDK1;MCM10;TYMS                                                                        |
| R-HSA-69618        | Mitotic Spindle Checkpoint                                                        | 2.22E-11 | CDC20;BIRC5;CDCA8;KIF2C;CENPN;CENPA;BUB1                                                           |

|               |                                                   |          |                                                                 |
|---------------|---------------------------------------------------|----------|-----------------------------------------------------------------|
| R-HSA-453279  | Mitotic G1 phase and G1/S transition              | 4.04E-11 | CDC45;CCNE1;CDK1;MCM10;TYMS                                     |
| R-HSA-9648025 | EML4 and NUDC in mitotic spindle formation        | 4.73E-11 | CDC20;BIRC5;CDCA8;KIF2C;CENPN;CENPA;BUB1                        |
| R-HSA-68886   | M Phase                                           | 6.14E-11 | CDC20;CCNB2;PTTG1;CDCA5;CDK1;BIRC5;CDCA8;KIF2C;CENPN;CENPA;BUB1 |
| R-HSA-5663220 | RHO GTPases Activate Formins                      | 2.92E-10 | CDC20;BIRC5;CDCA8;KIF2C;CENPN;CENPA;BUB1                        |
| R-HSA-453276  | Regulation of mitotic cell cycle                  | 2.22E-07 | CDC20;PTTG1;CDK1;BUB1;AURKA                                     |
| R-HSA-174143  | APC/C-mediated degradation of cell cycle proteins | 2.22E-07 | CDC20;PTTG1;CDK1;BUB1;AURKA                                     |
| R-HSA-195258  | RHO GTPase Effectors                              | 2.49E-07 | CDC20;BIRC5;CDCA8;KIF2C;CENPN;CENPA;BUB1                        |
