# Supplementary material for: A novel age-related gene expression signature associates with proliferation and disease progression in breast cancer
Source: PubMed Central journal article supplement (PMC9643541; doi:10.1038/s41416-022-01953-w), 2022-08-23
Supplement: 41416_2022_1953_MOESM5_ESM.pdf [file 41416_2022_1953_MOESM5_ESM.pdf]

**Supplementary Table 5:** Multivariate logistic regression showed that both age and molecular subtypes were independent predictors for the 6GPS in METABRIC discovery cohort.

| <b>METABRIC discovery</b> |              |                                     |          |
|---------------------------|--------------|-------------------------------------|----------|
| <b>Variables</b>          | <b>n (%)</b> | <b>Multivariate OR<br/>(95% CI)</b> | <b>P</b> |
| <b>Age</b>                |              |                                     | 0.007    |
| ≥ 40                      | 886 (94.4)   | 1                                   |          |
| < 40                      | 53 ( 5.6)    | 2.5 (1.29-4.79)                     |          |
| <b>Molecular subtype</b>  |              |                                     | <0.001   |
| Luminal A+B               | 734 (78.2)   | 1                                   |          |
| Non-Luminal (HER2; TNBC)  | 205 (21.8)   | 9.1 (6.40-12.96)                    |          |
