# Supplementary material for: A novel age-related gene expression signature associates with proliferation and disease progression in breast cancer
Source: PubMed Central journal article supplement (PMC9643541; doi:10.1038/s41416-022-01953-w), 2022-08-23

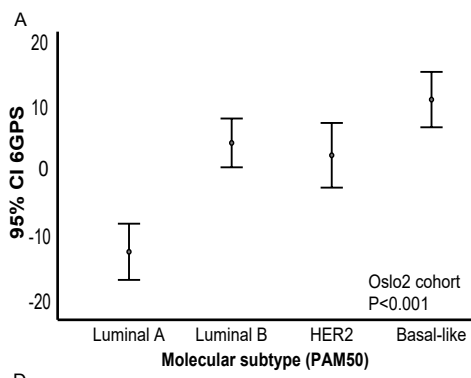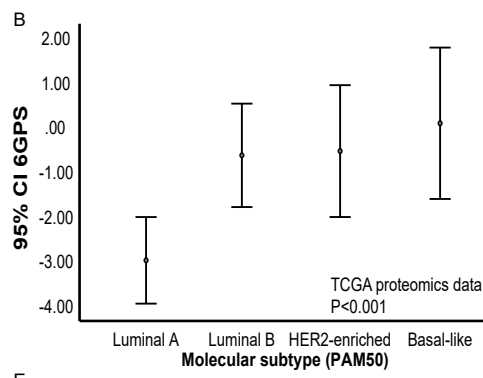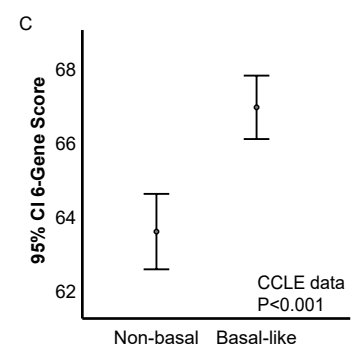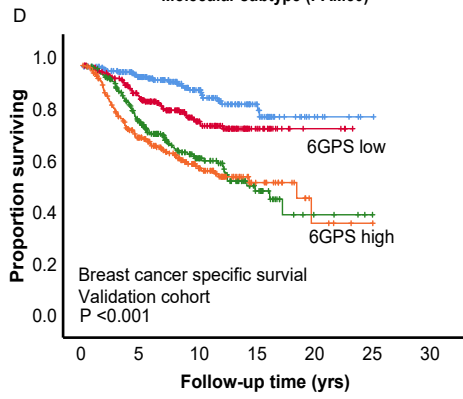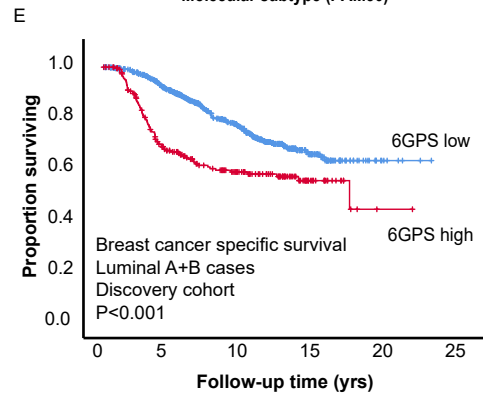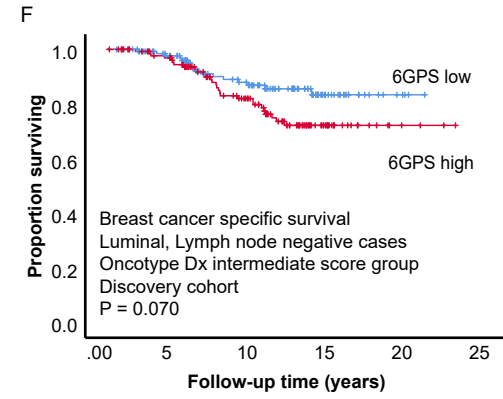

Supplement: 41416_2022_1953_MOESM12_ESM.pdf [file 41416_2022_1953_MOESM12_ESM.pdf]
